# Supplementary material for: A facile catalyst-free synthesis of gem-dihydroperoxides with aqueous hydrogen peroxide
Source: Royal Society of Chemistry journal article supplement (doi:10.1039/b917056a), 2010-01-01

# A Facile Catalyst-Free Synthesis of *gem*-Dihydroperoxide with Aqueous Hydrogen Peroxide

*Norihiro Tada, Lei Cui, Hiroaki Okubo, Tsuyoshi Miura and Akichika Itoh\**

Gifu Pharmaceutical University, 5-6-1 Mitahora-higashi, Gifu 502-8585, Japan.

E-mail: itoha@gifu-pu.ac.jp

## Supporting Information

### Table of Contents:

|                             |   |
|-----------------------------|---|
| General .....               | 2 |
| Experimental Procedure..... | 2 |
| NMR Spectra.....            | 3 |

## Experimental Section

**General.** 35% aqueous hydrogen peroxide was purchased from Tokyo Chemical Industry. 1,2-Dimethoxyethane (dehydrated) and other dry solvent were purchased from Kanto Kagaku. The  $^1\text{H}$  NMR spectra were recorded using JEOL JNM-EX-400 and JEOL JNM-AL-400 (400 MHz) spectrometers. Part of the products was isolated by preparative TLC (Merck, TLC plates, silica gel 60 F<sub>254</sub>, Art 5744) or column chromatography on silica gel (Kanto Kagaku, silica gel 60N, spherical, neutral, 40-50 $\mu\text{m}$ ).

**A typical procedure of the dihydroperoxidation is as follows:** To a solution of 4-*t*-butylcyclohexanone (46.3 mg, 0.30 mmol) in dry DME solution (3 mL) was added 35 % H<sub>2</sub>O<sub>2</sub> (130  $\mu\text{L}$ , 1.50 mmol) at room temperature. After stirring at room temperature for 20 h, the reaction mixture was concentrated under reduced pressure. The residue was purified by preparative TLC (hexanen:AcOEt = 2 : 1) to afford the pure 4-*t*-butylcyclohexylidenebishydroperoxide (60.7 mg, 99 %).

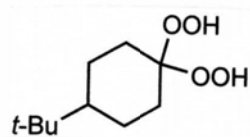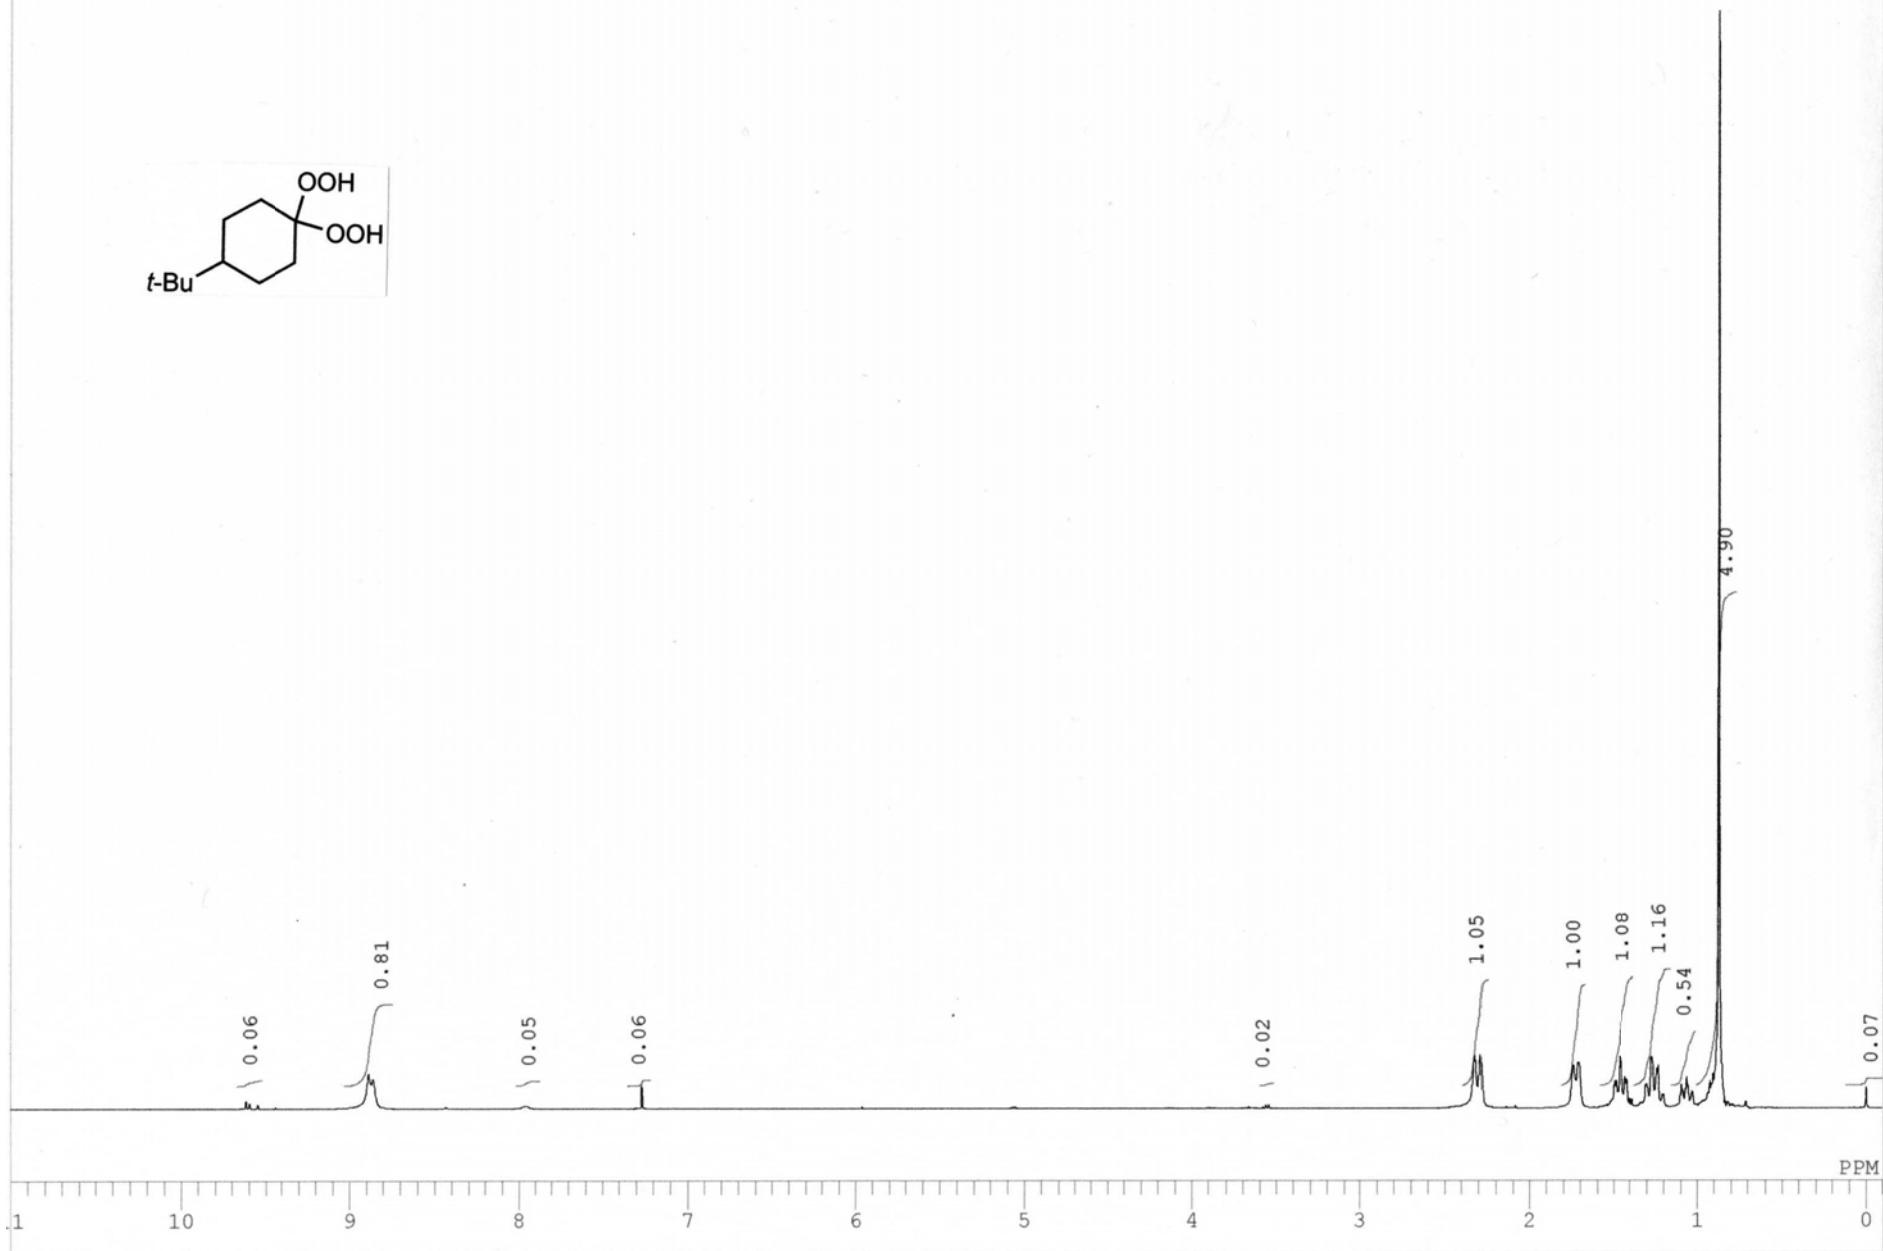

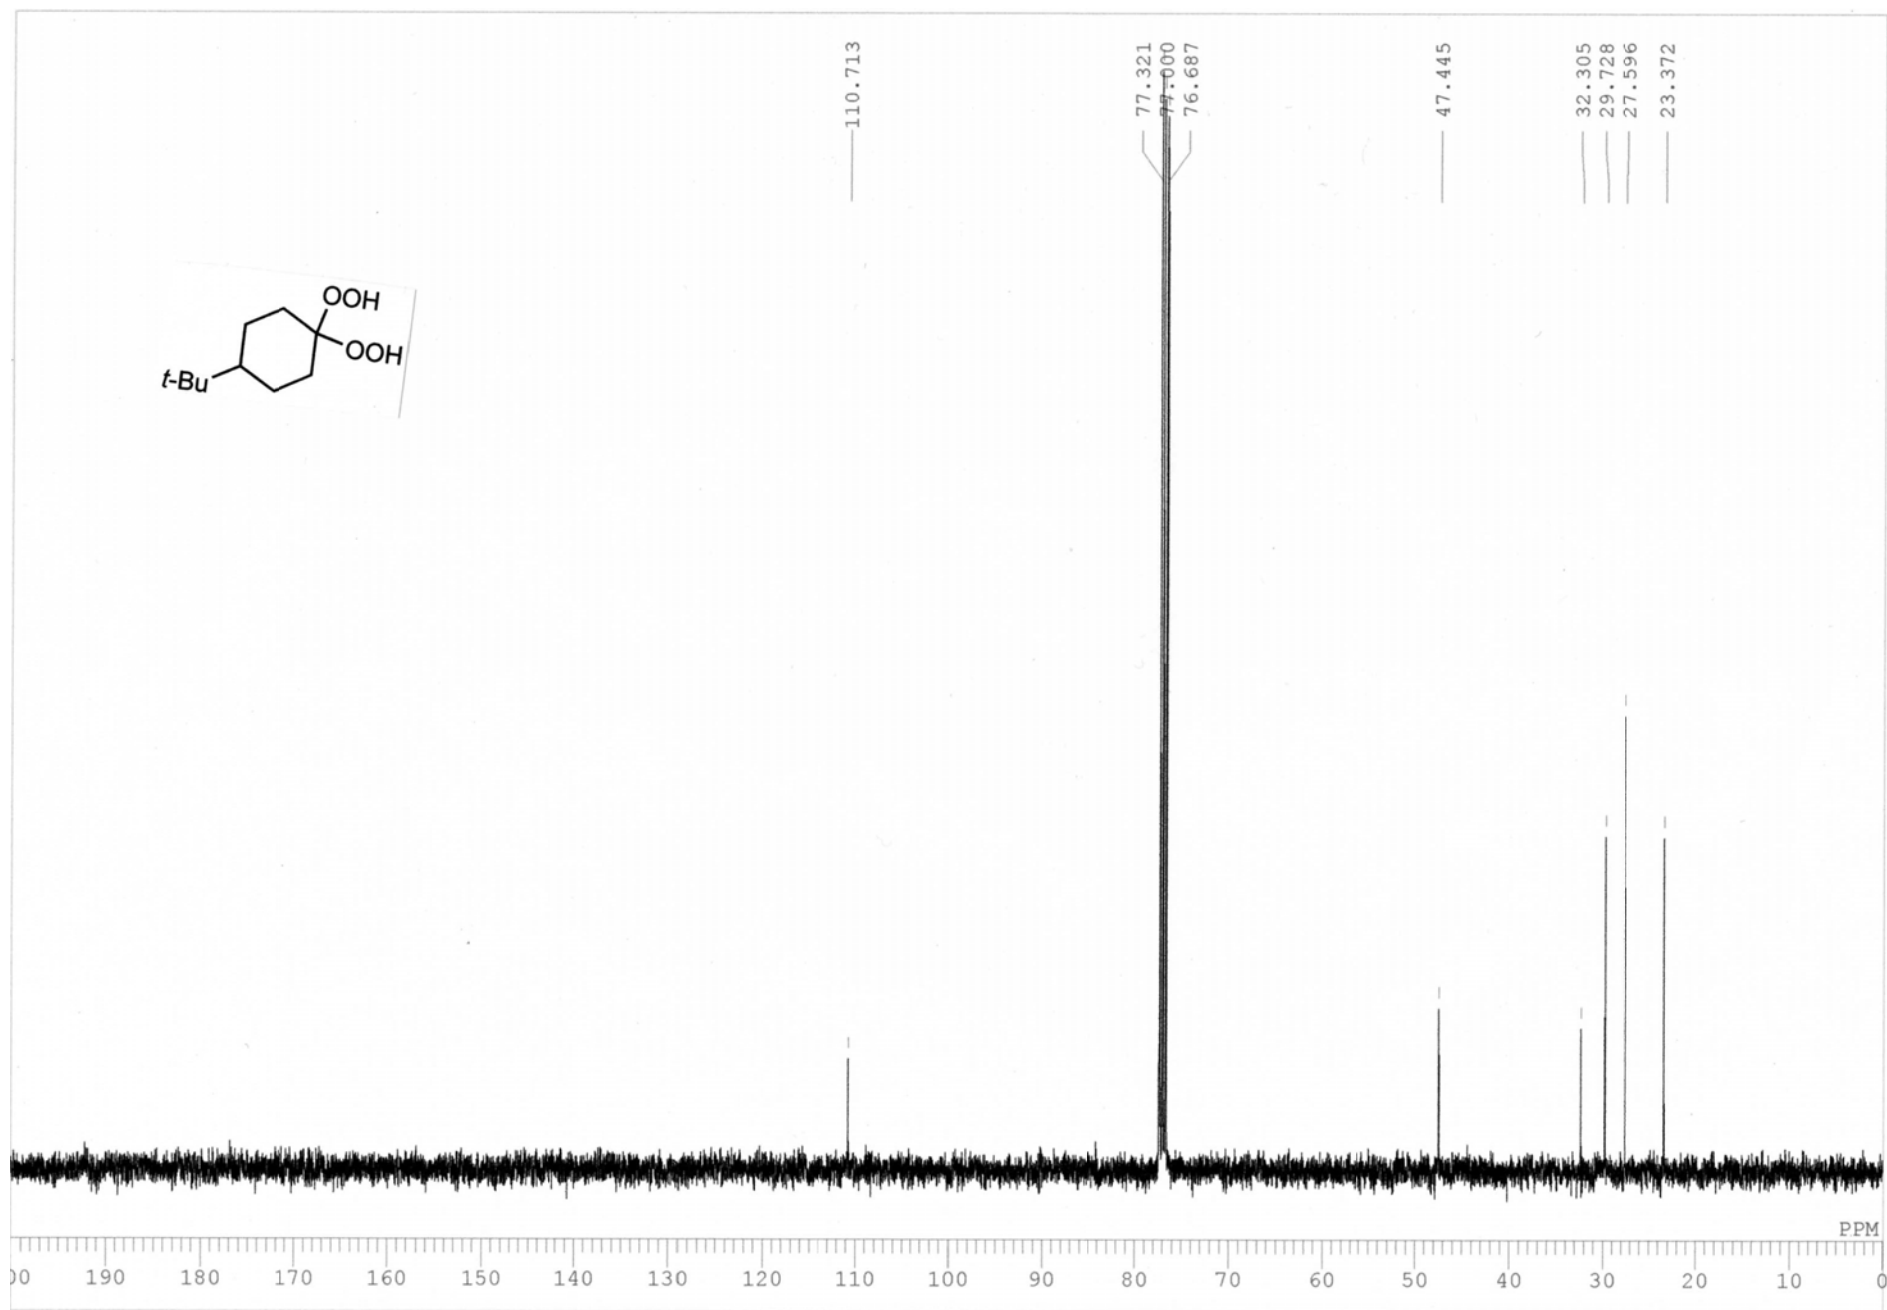

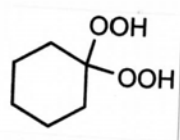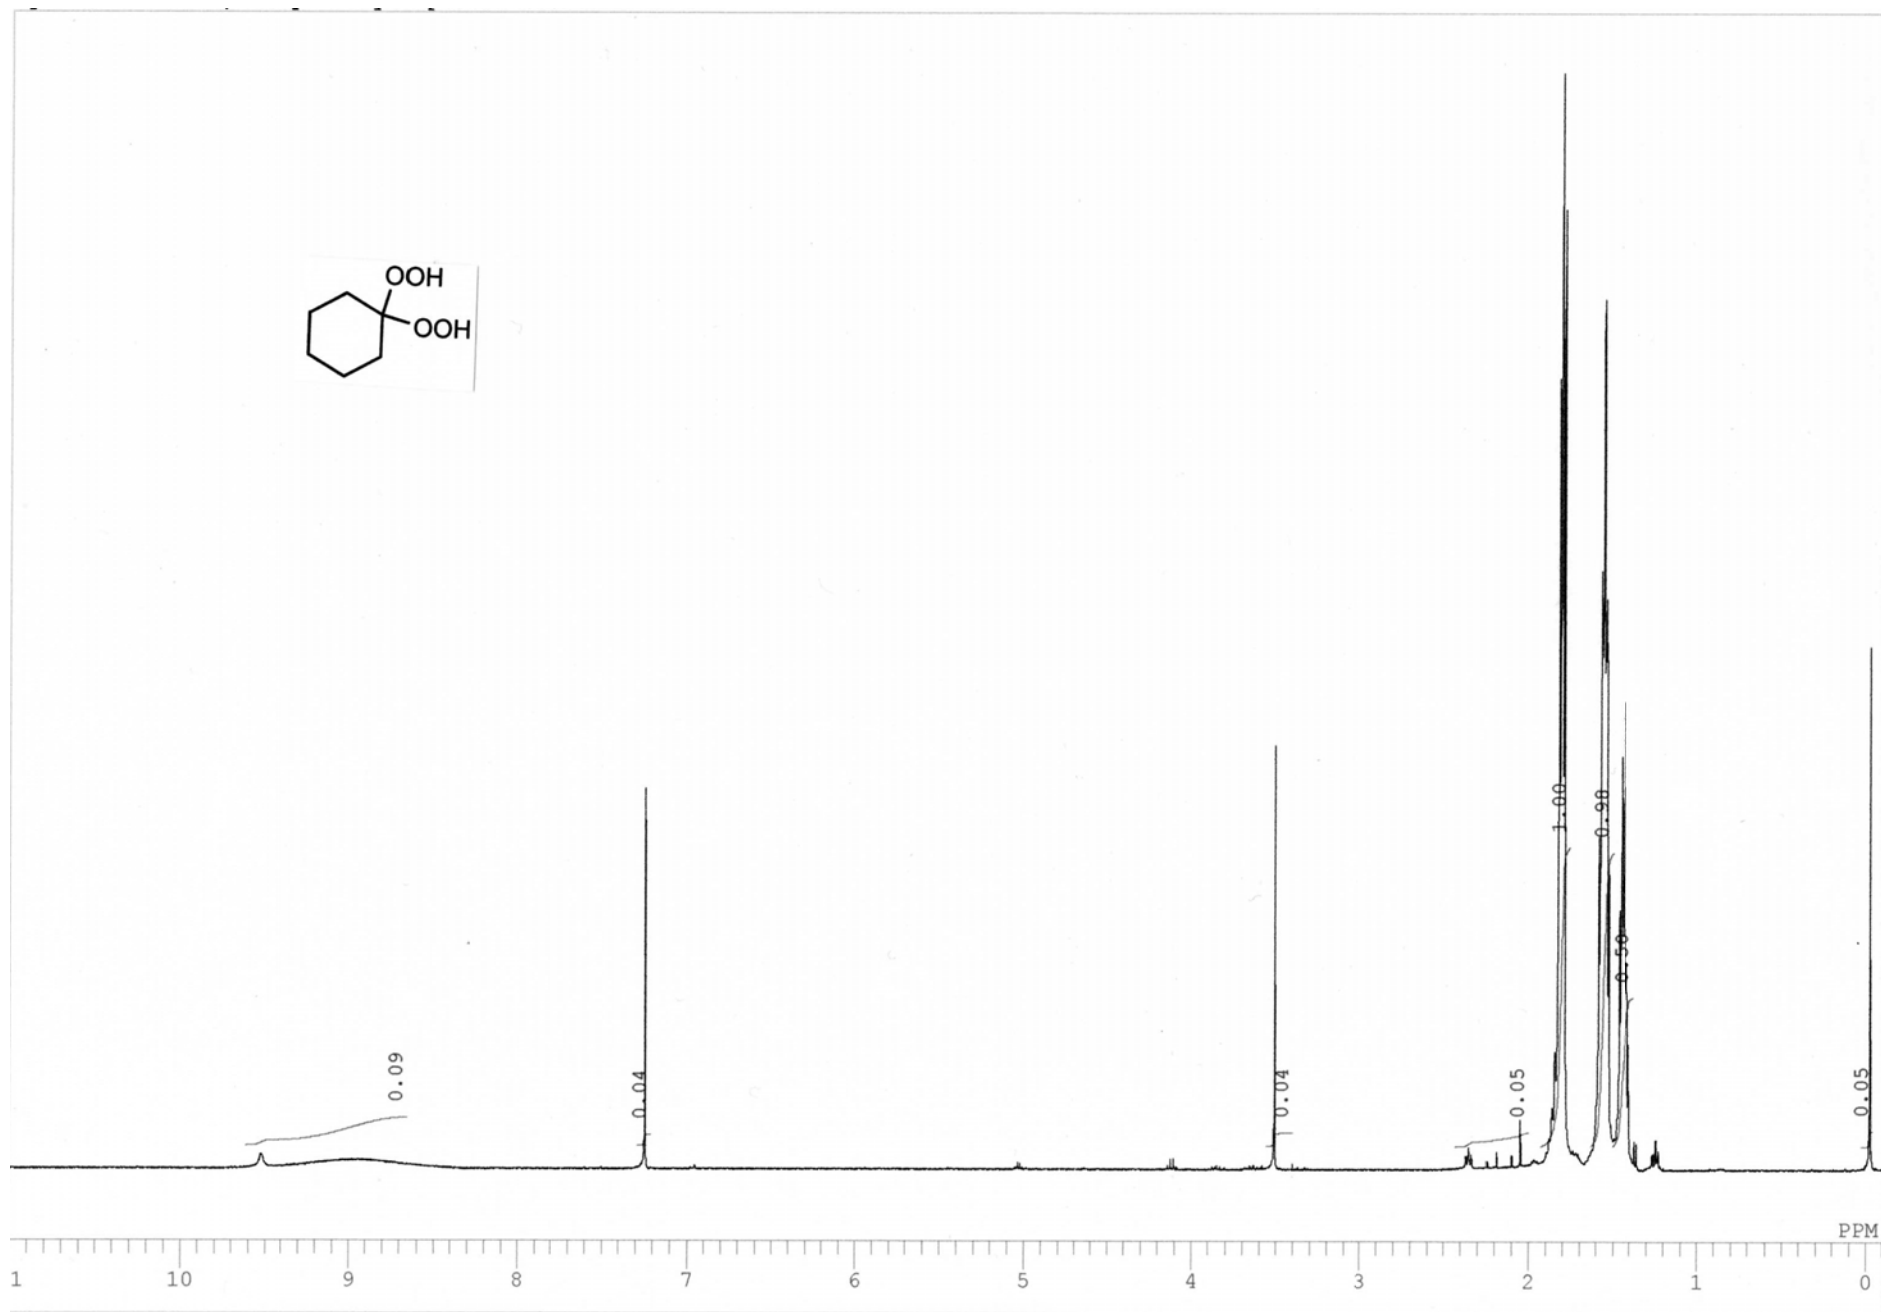

HRMS 217.110.475

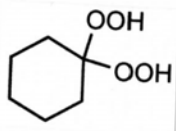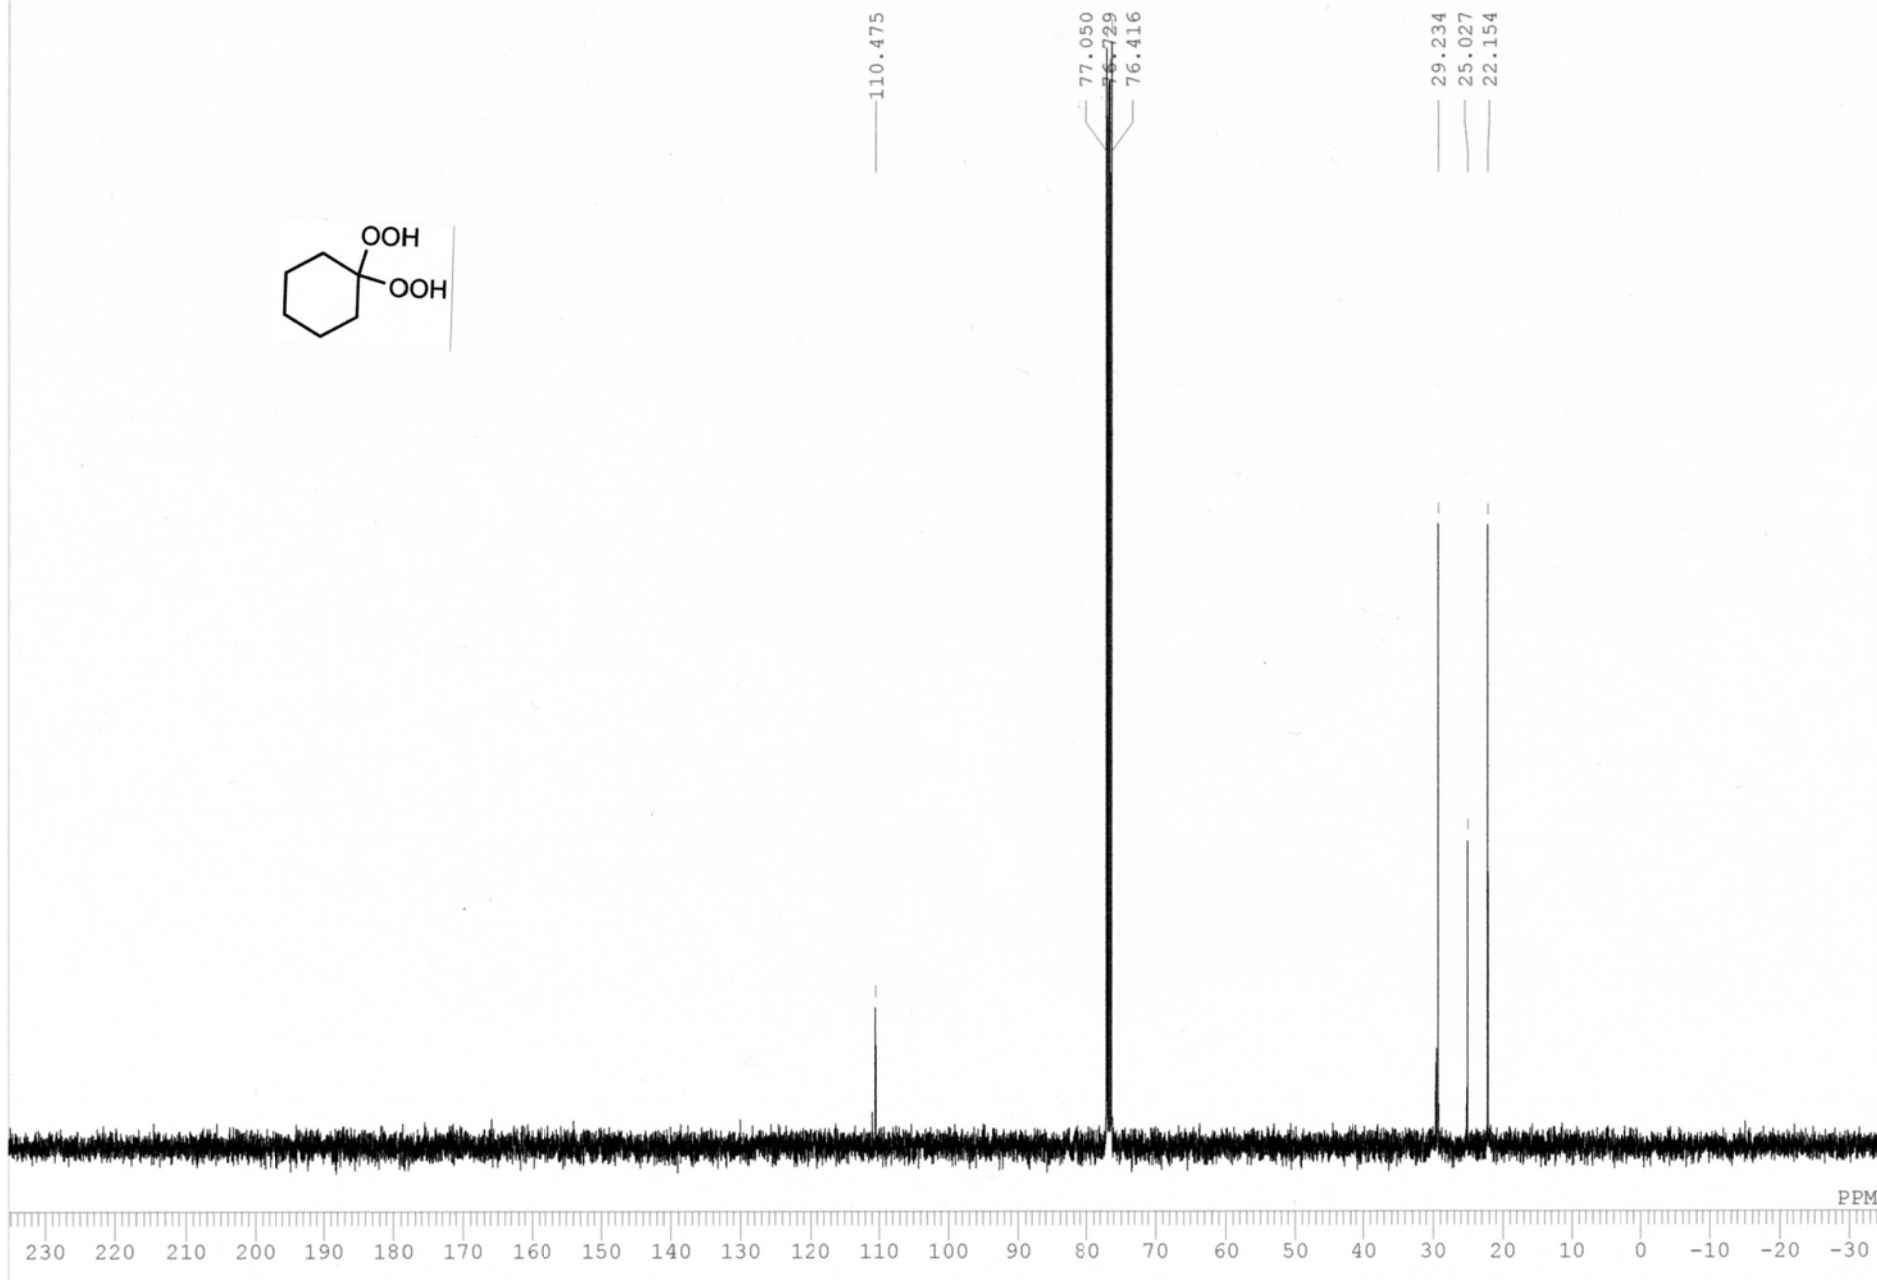

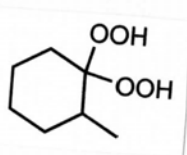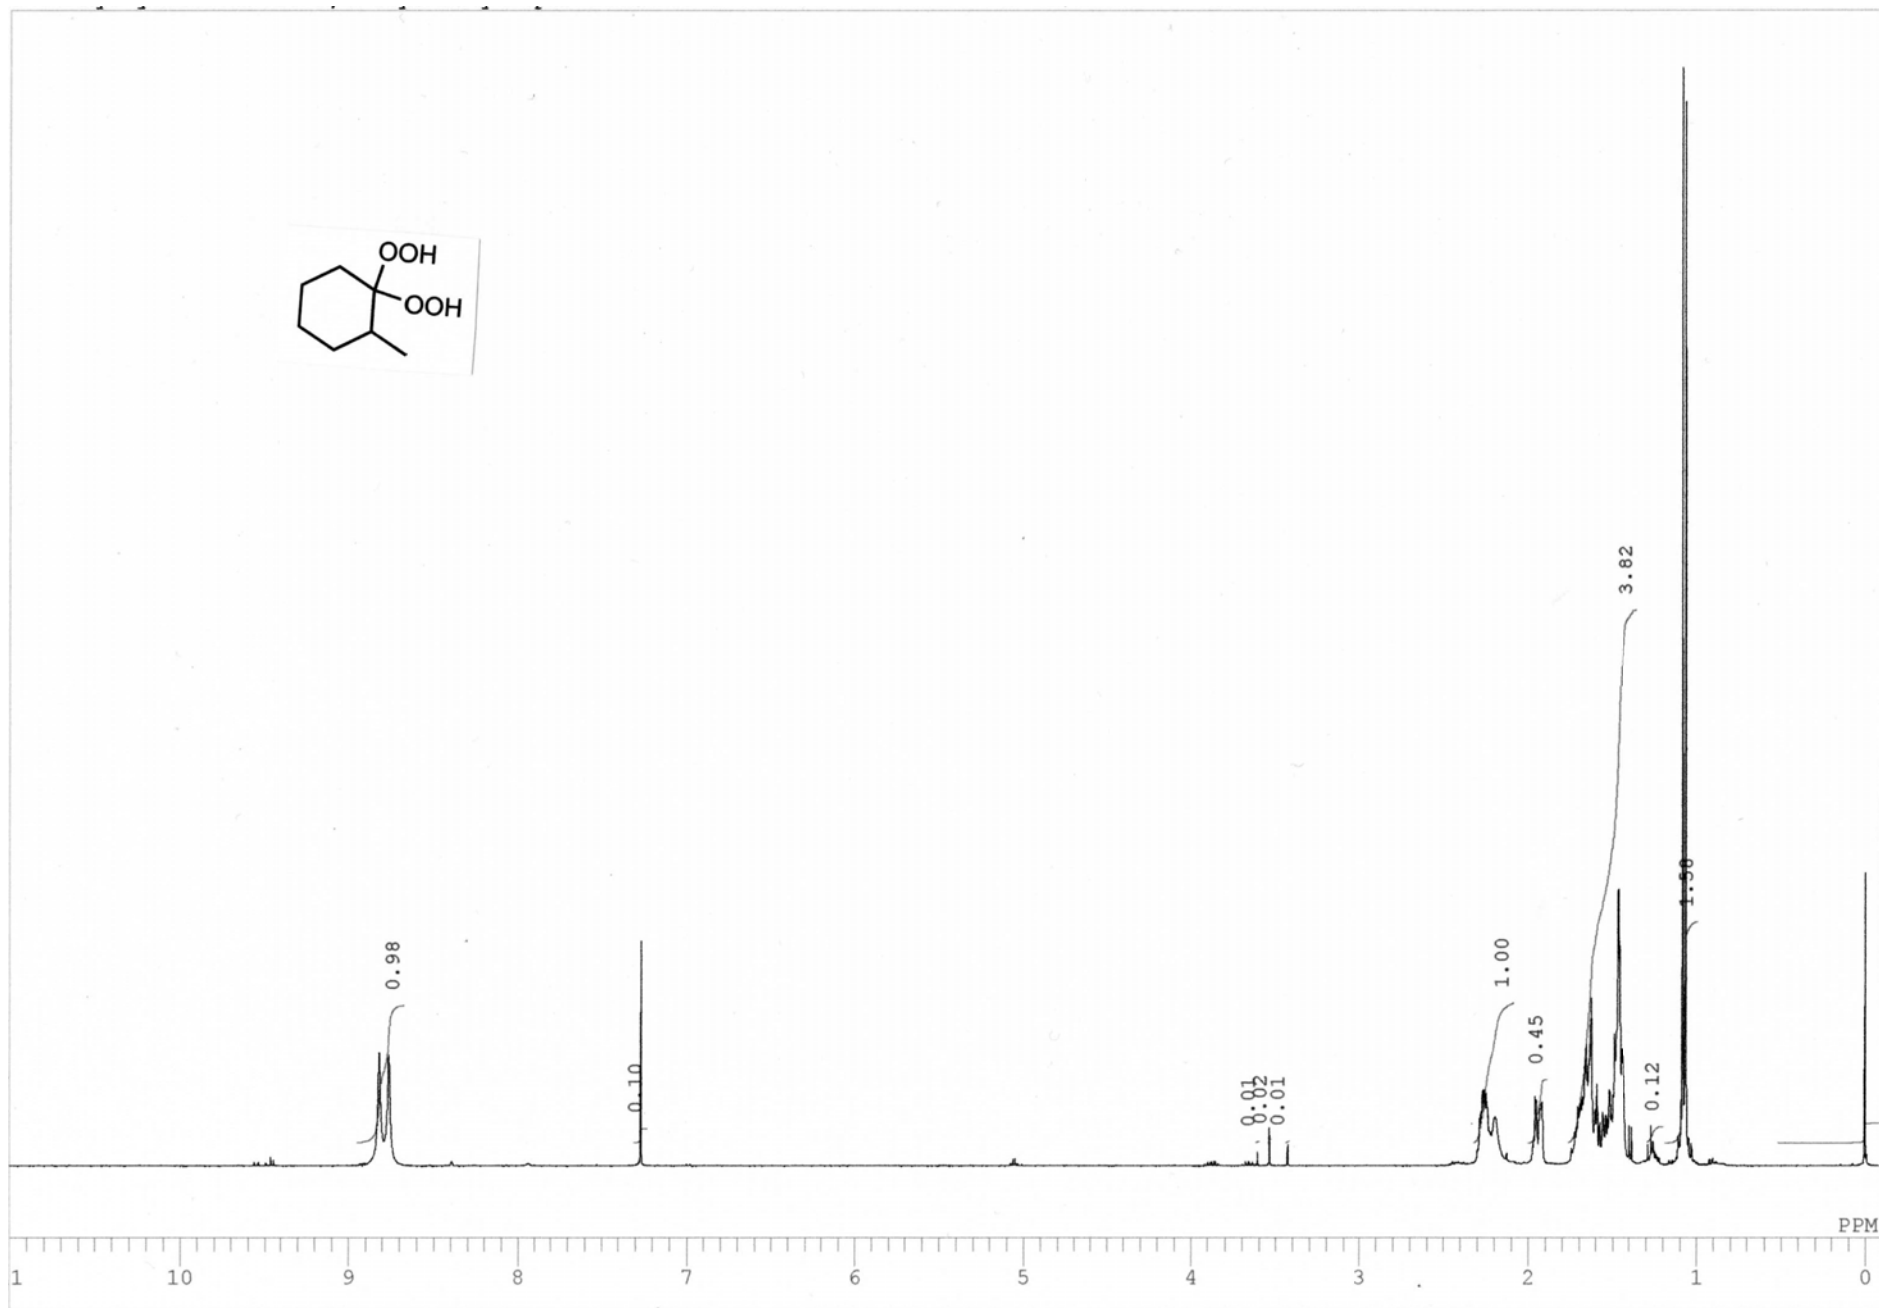

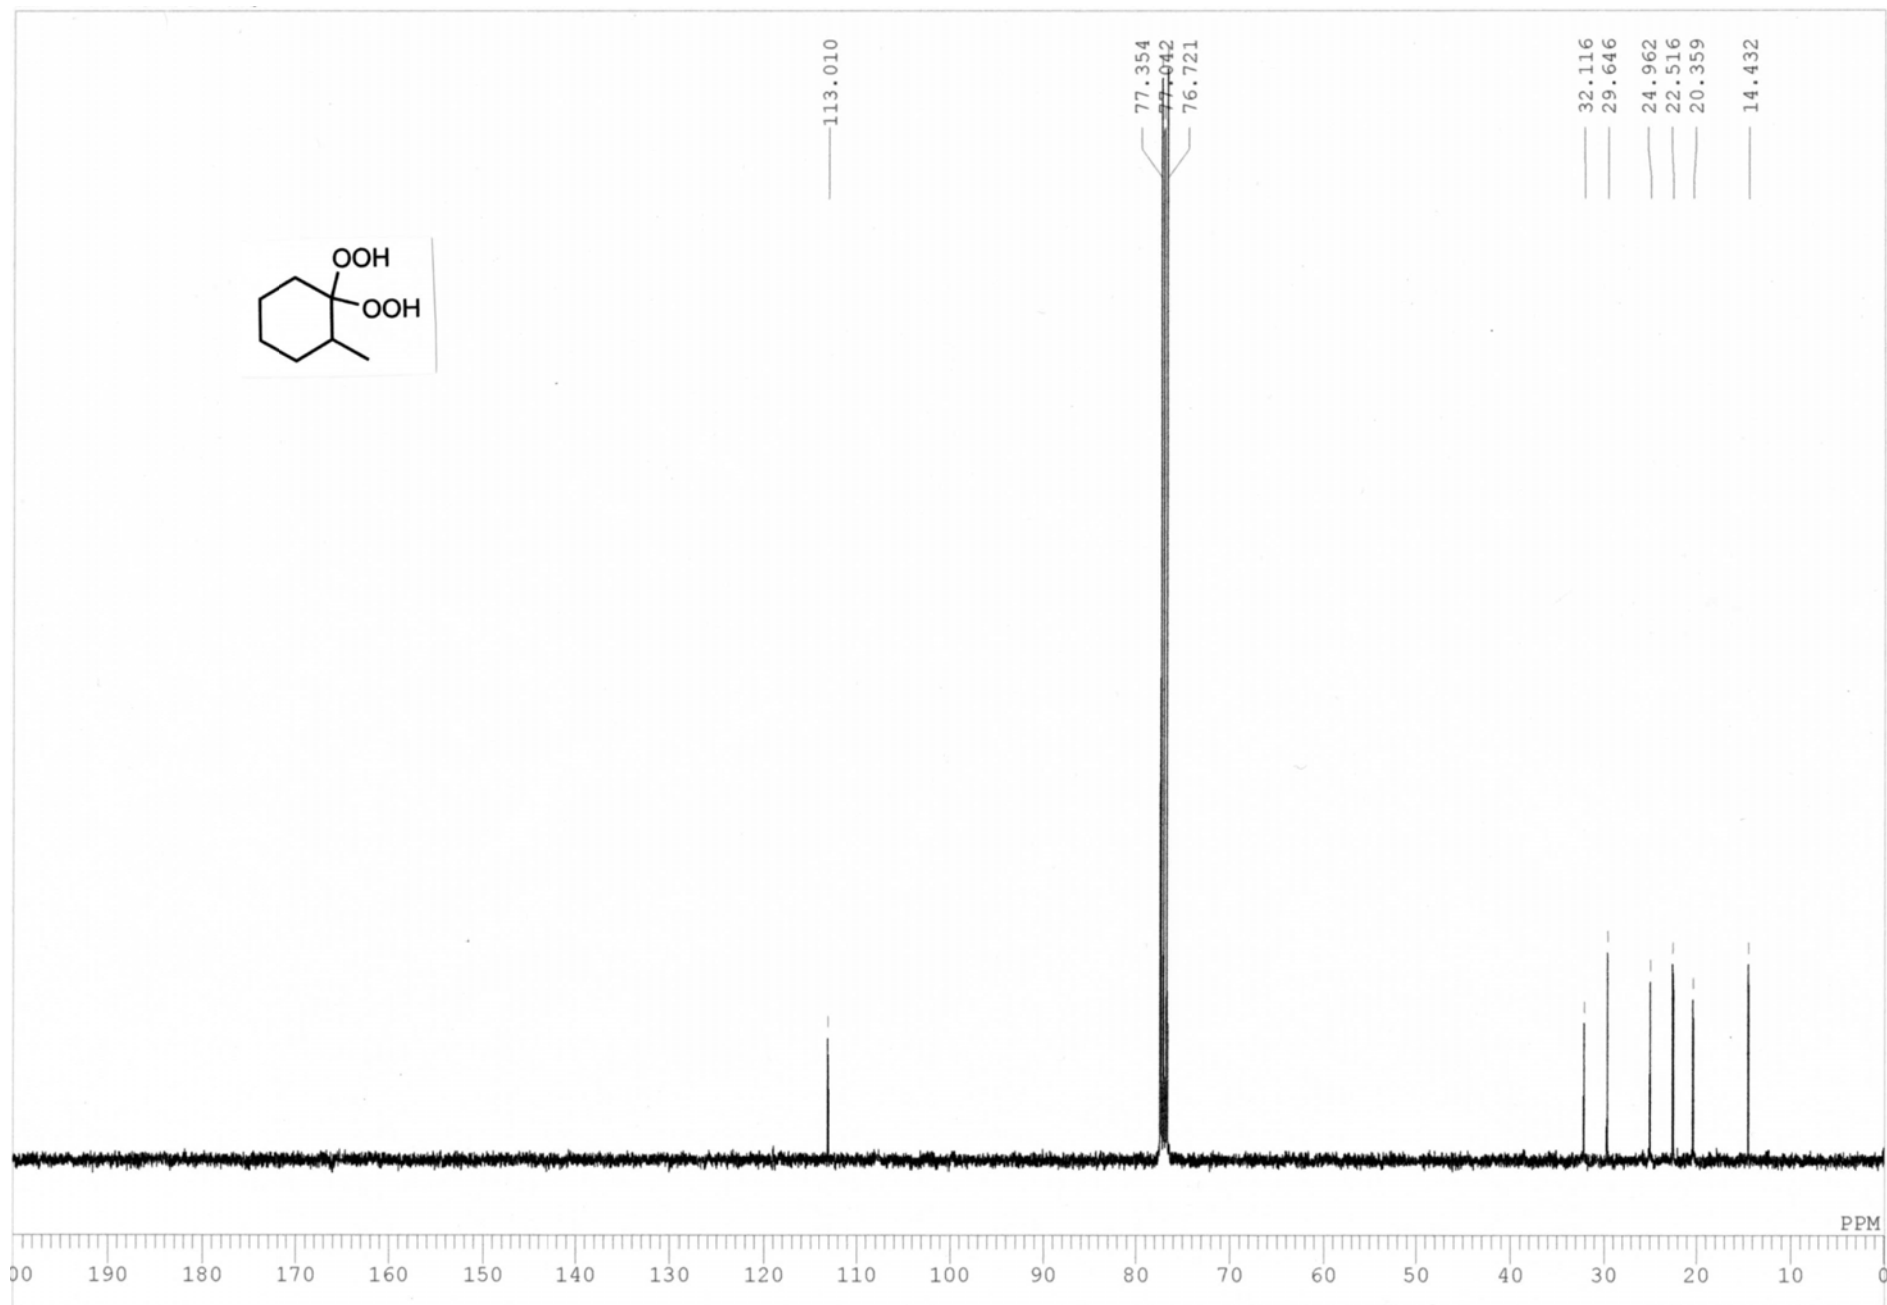



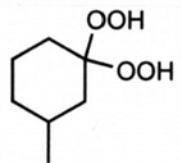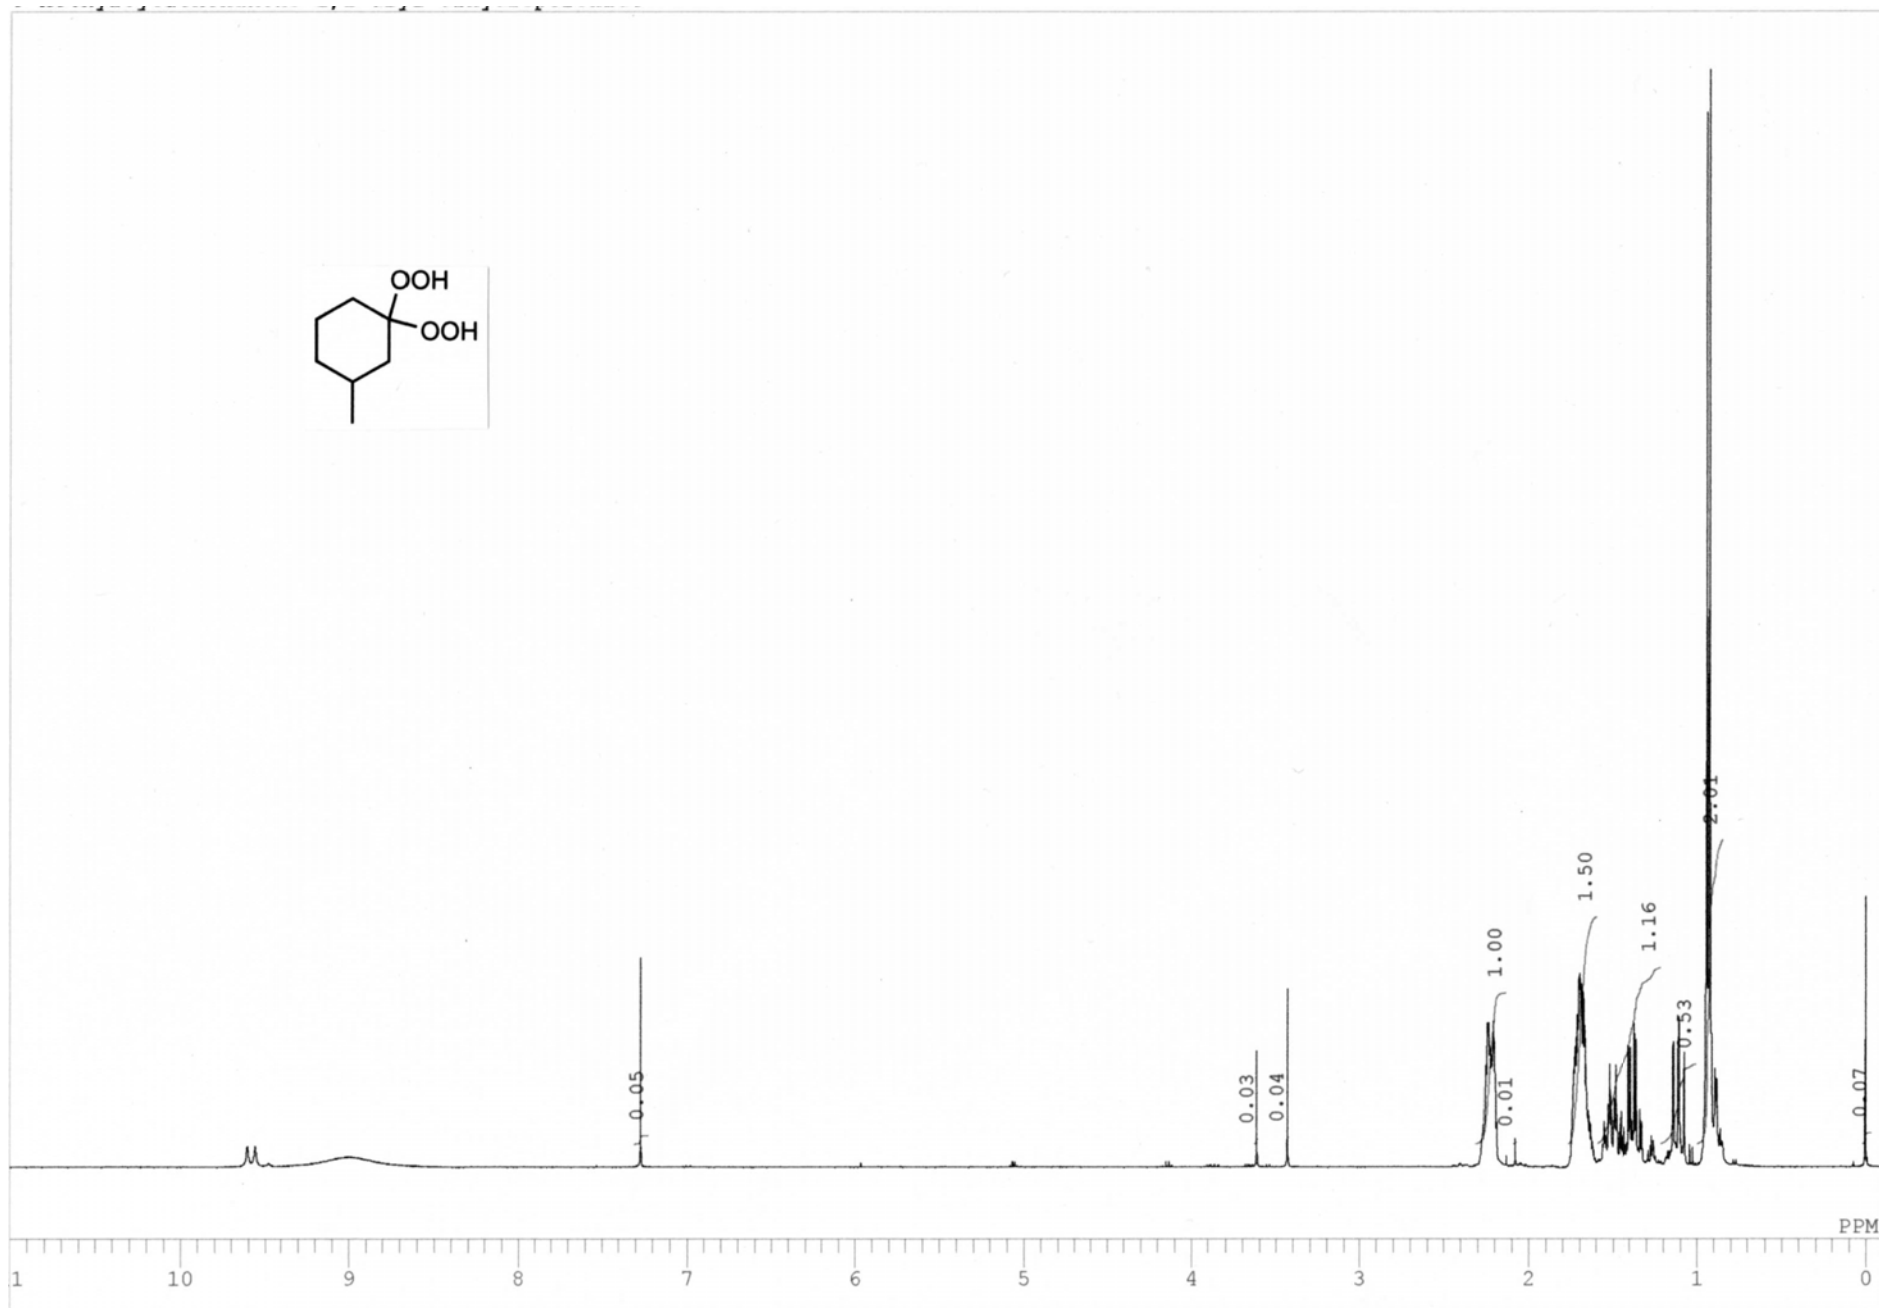

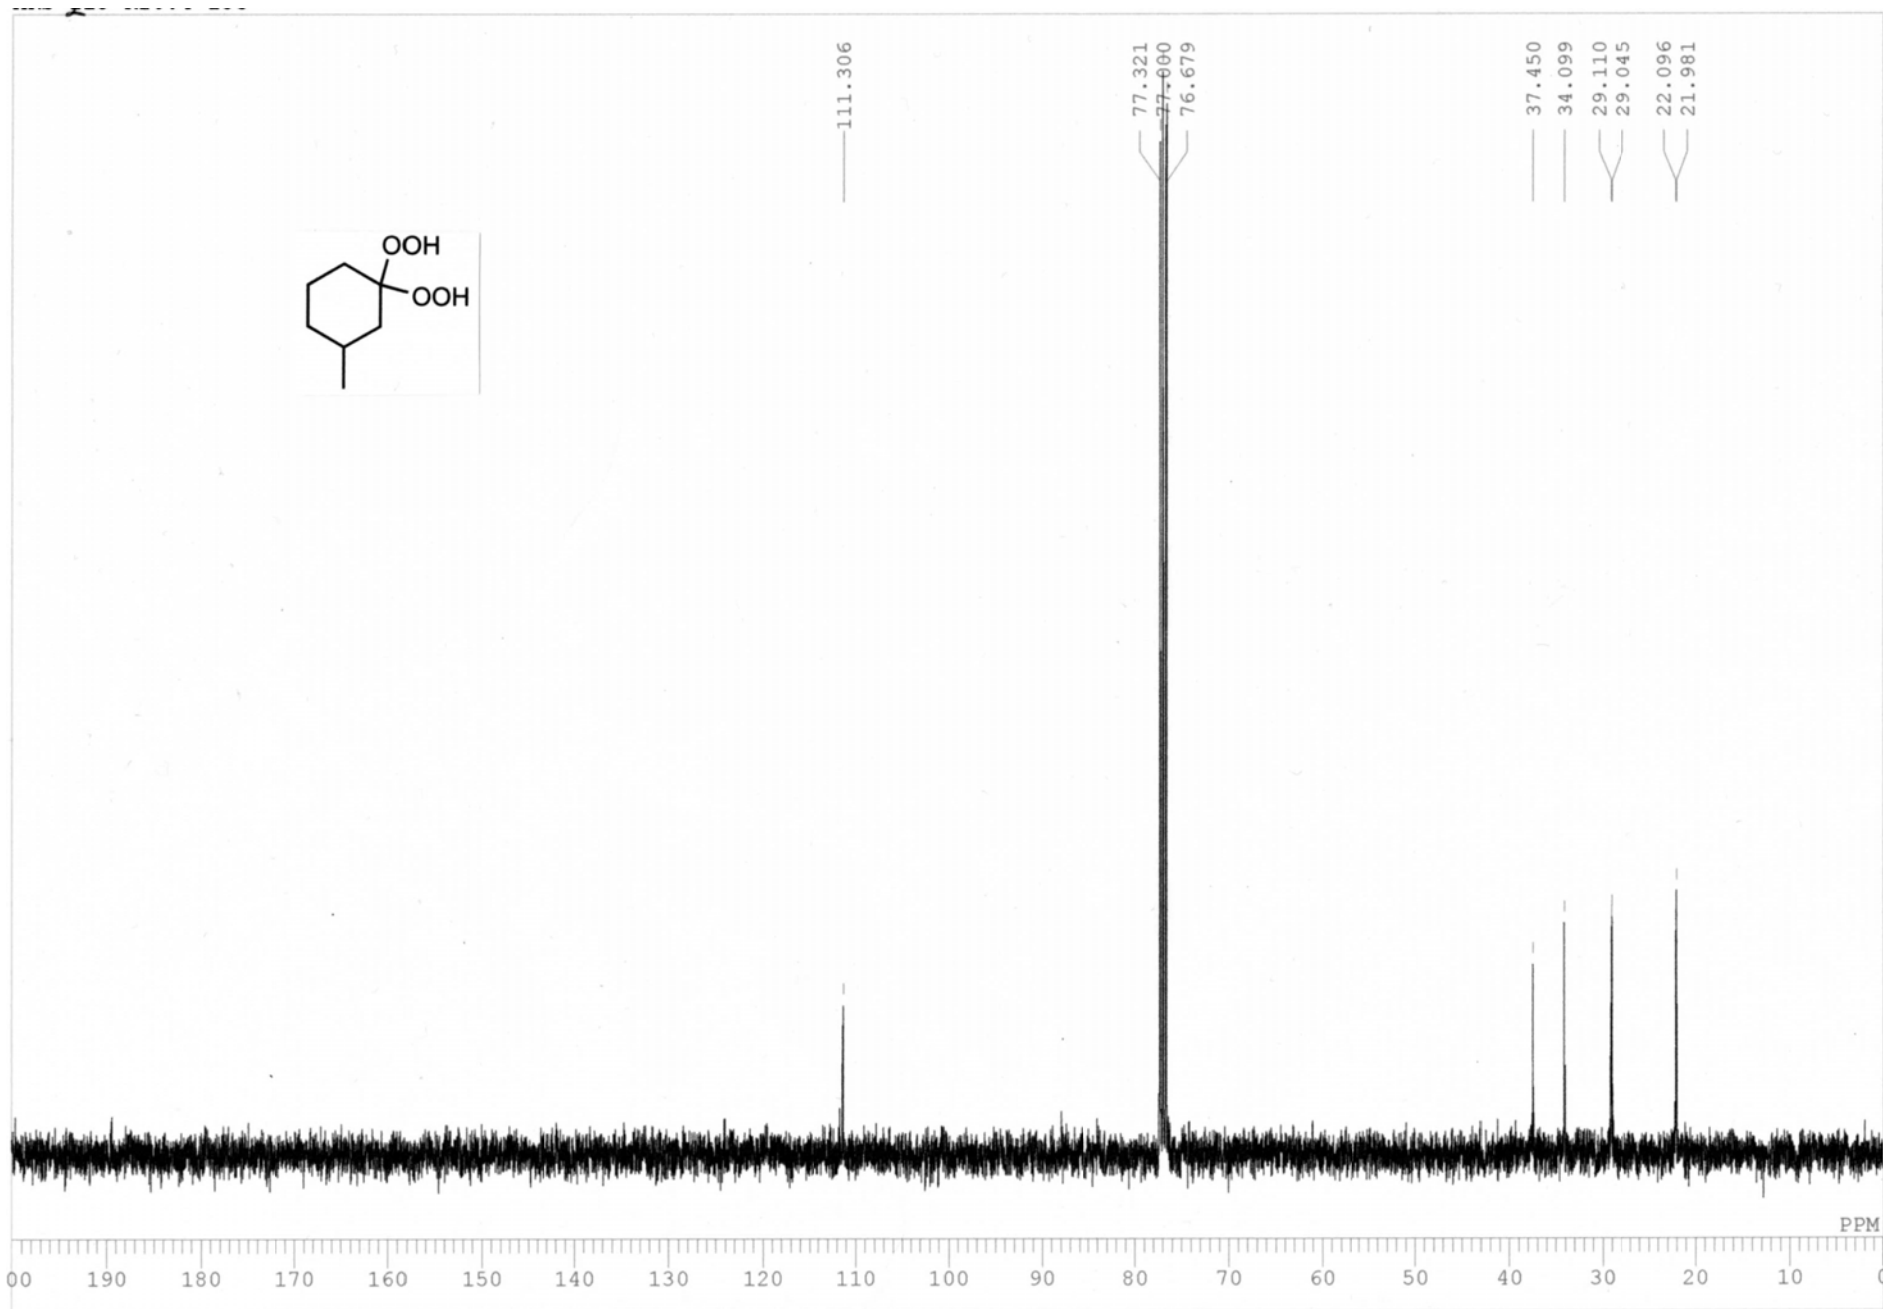

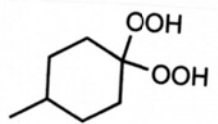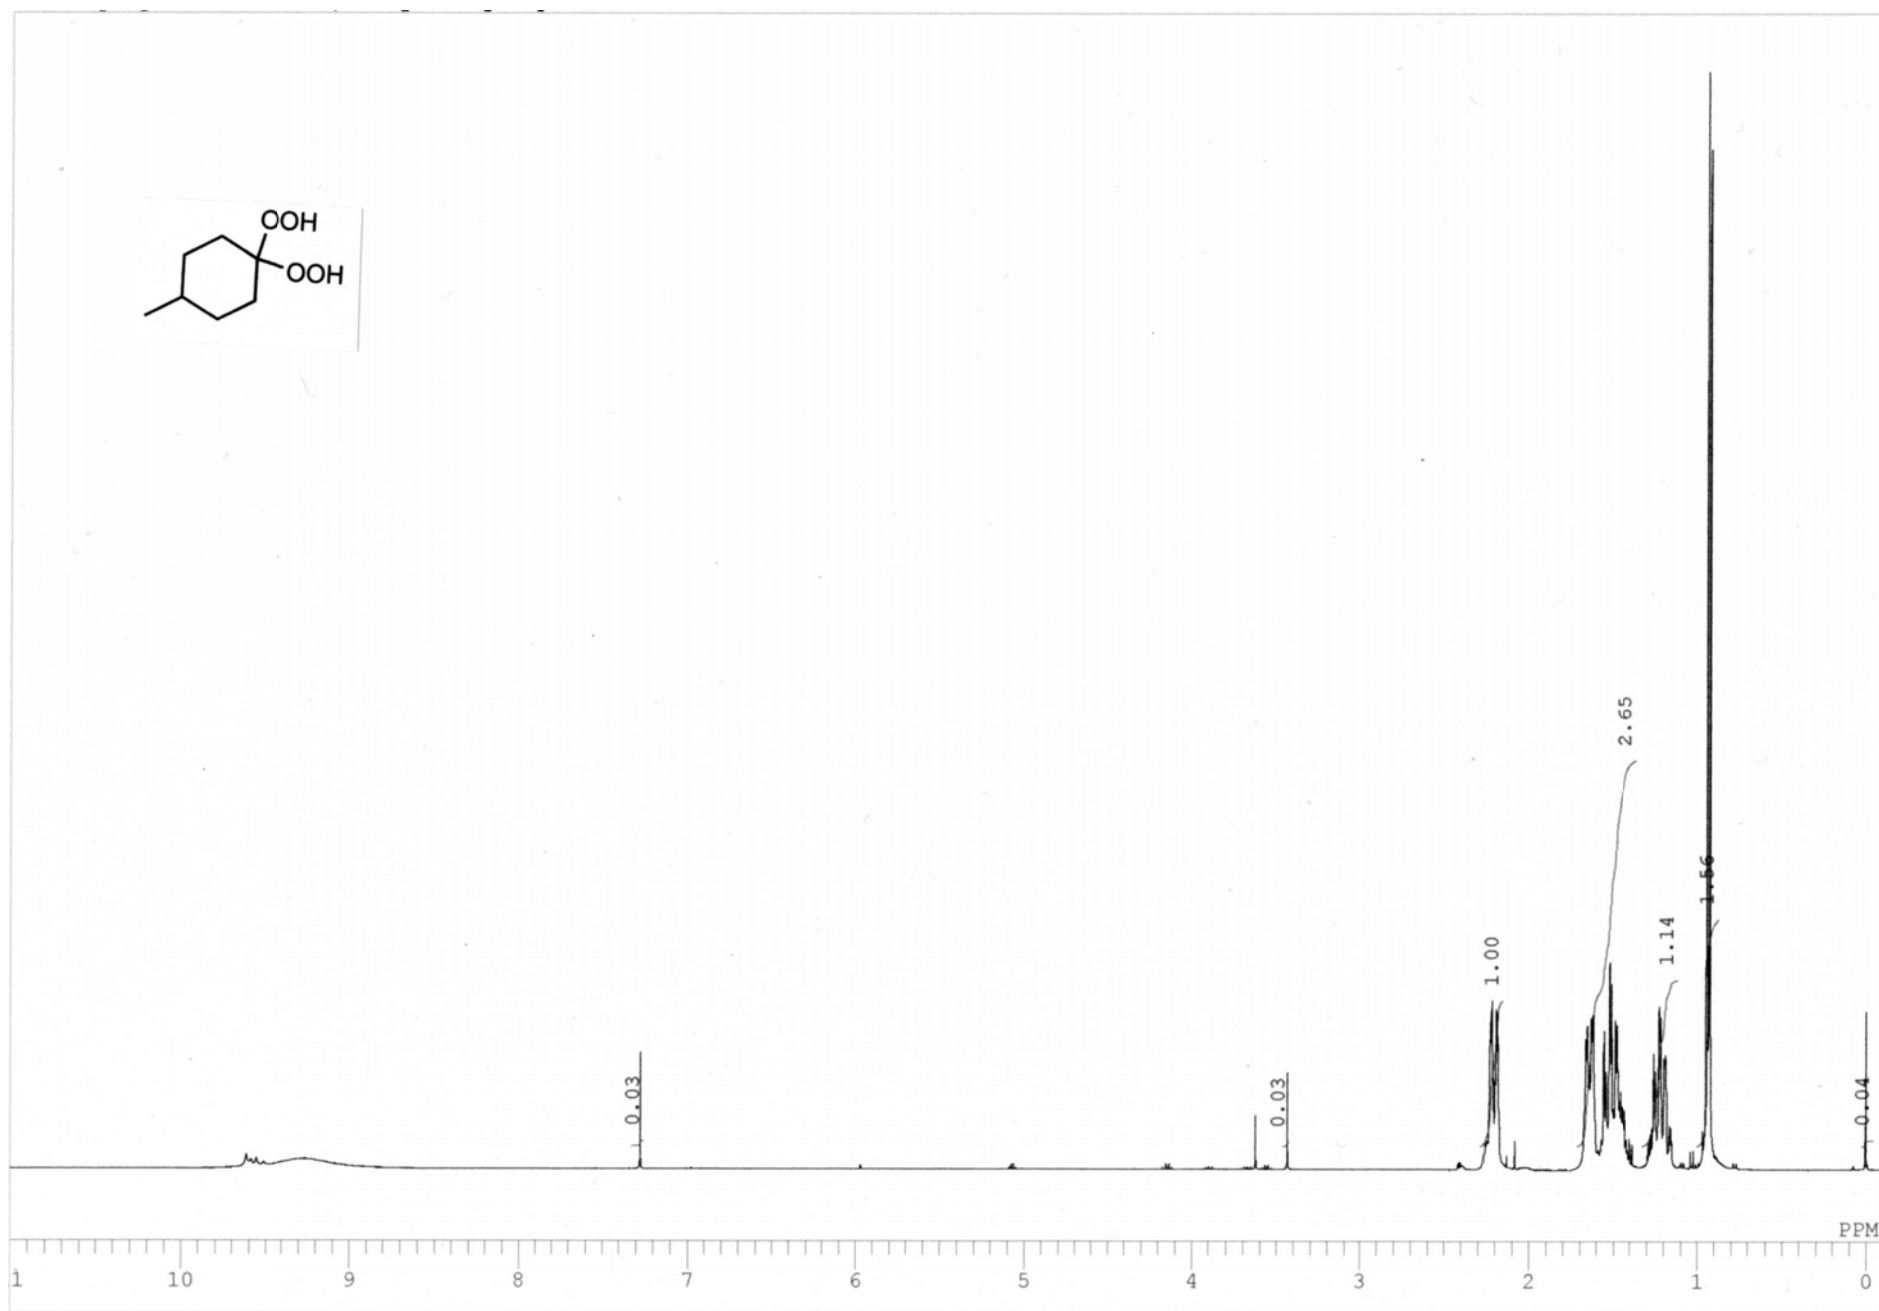

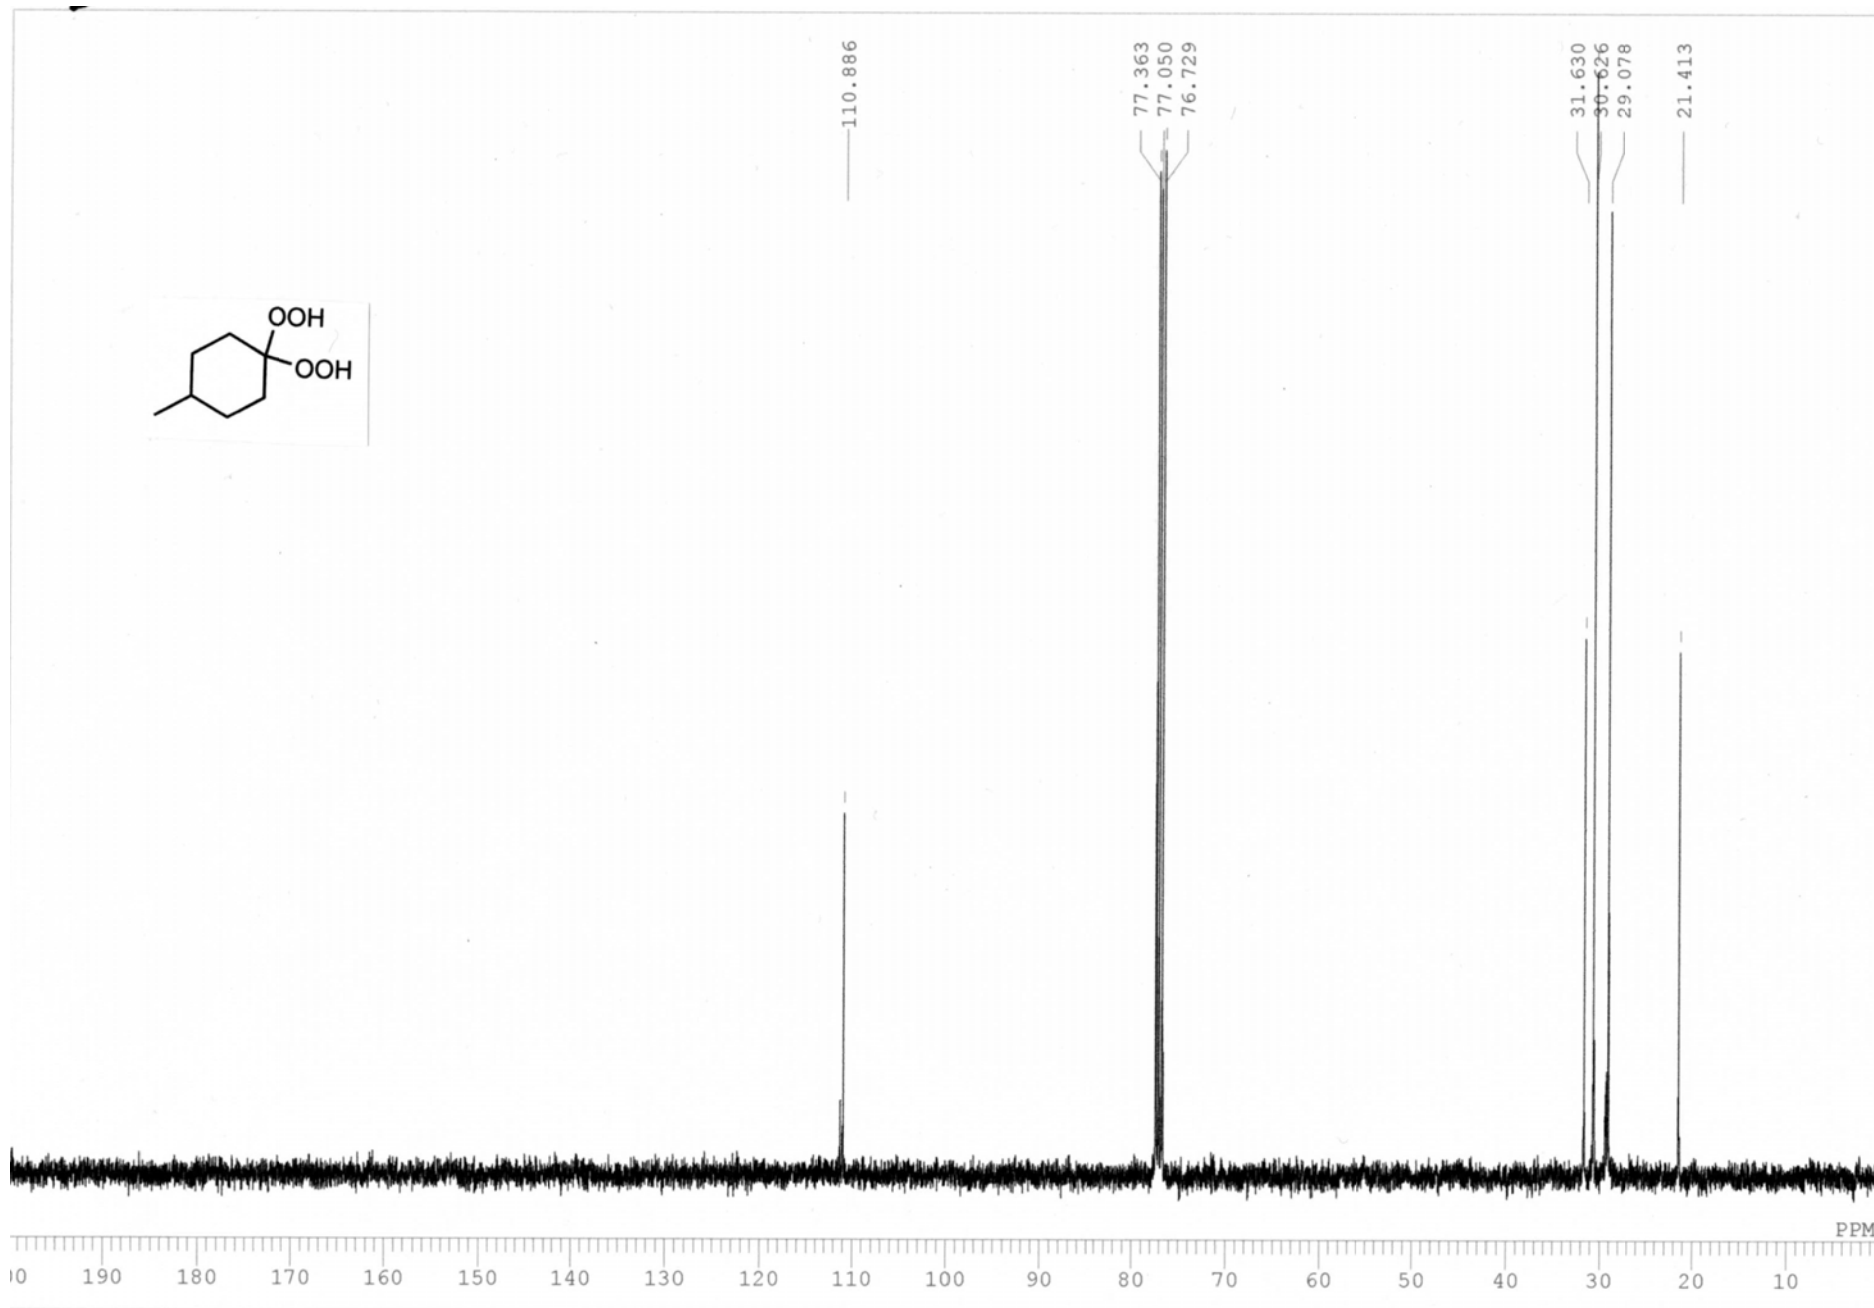

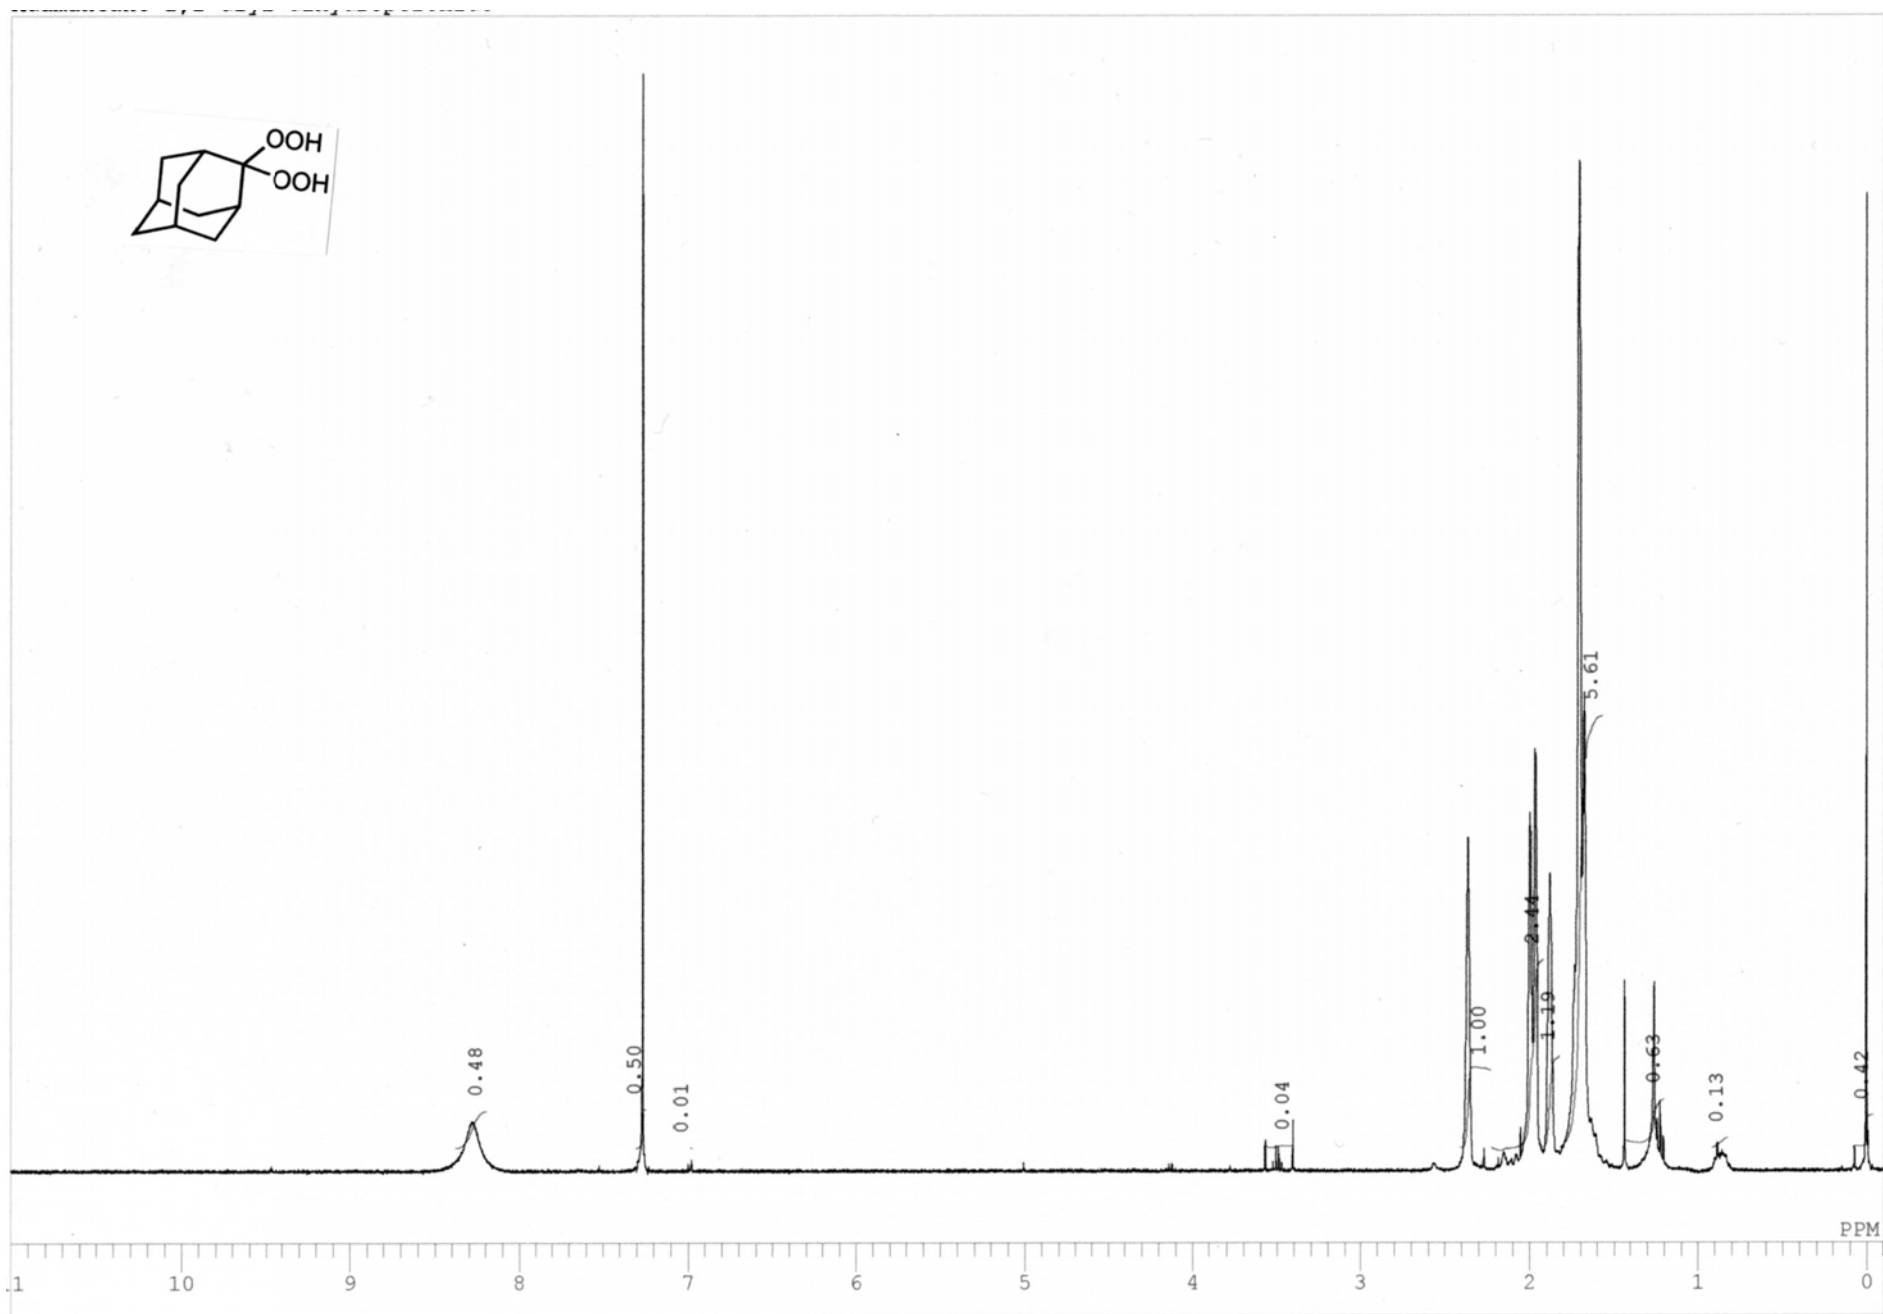

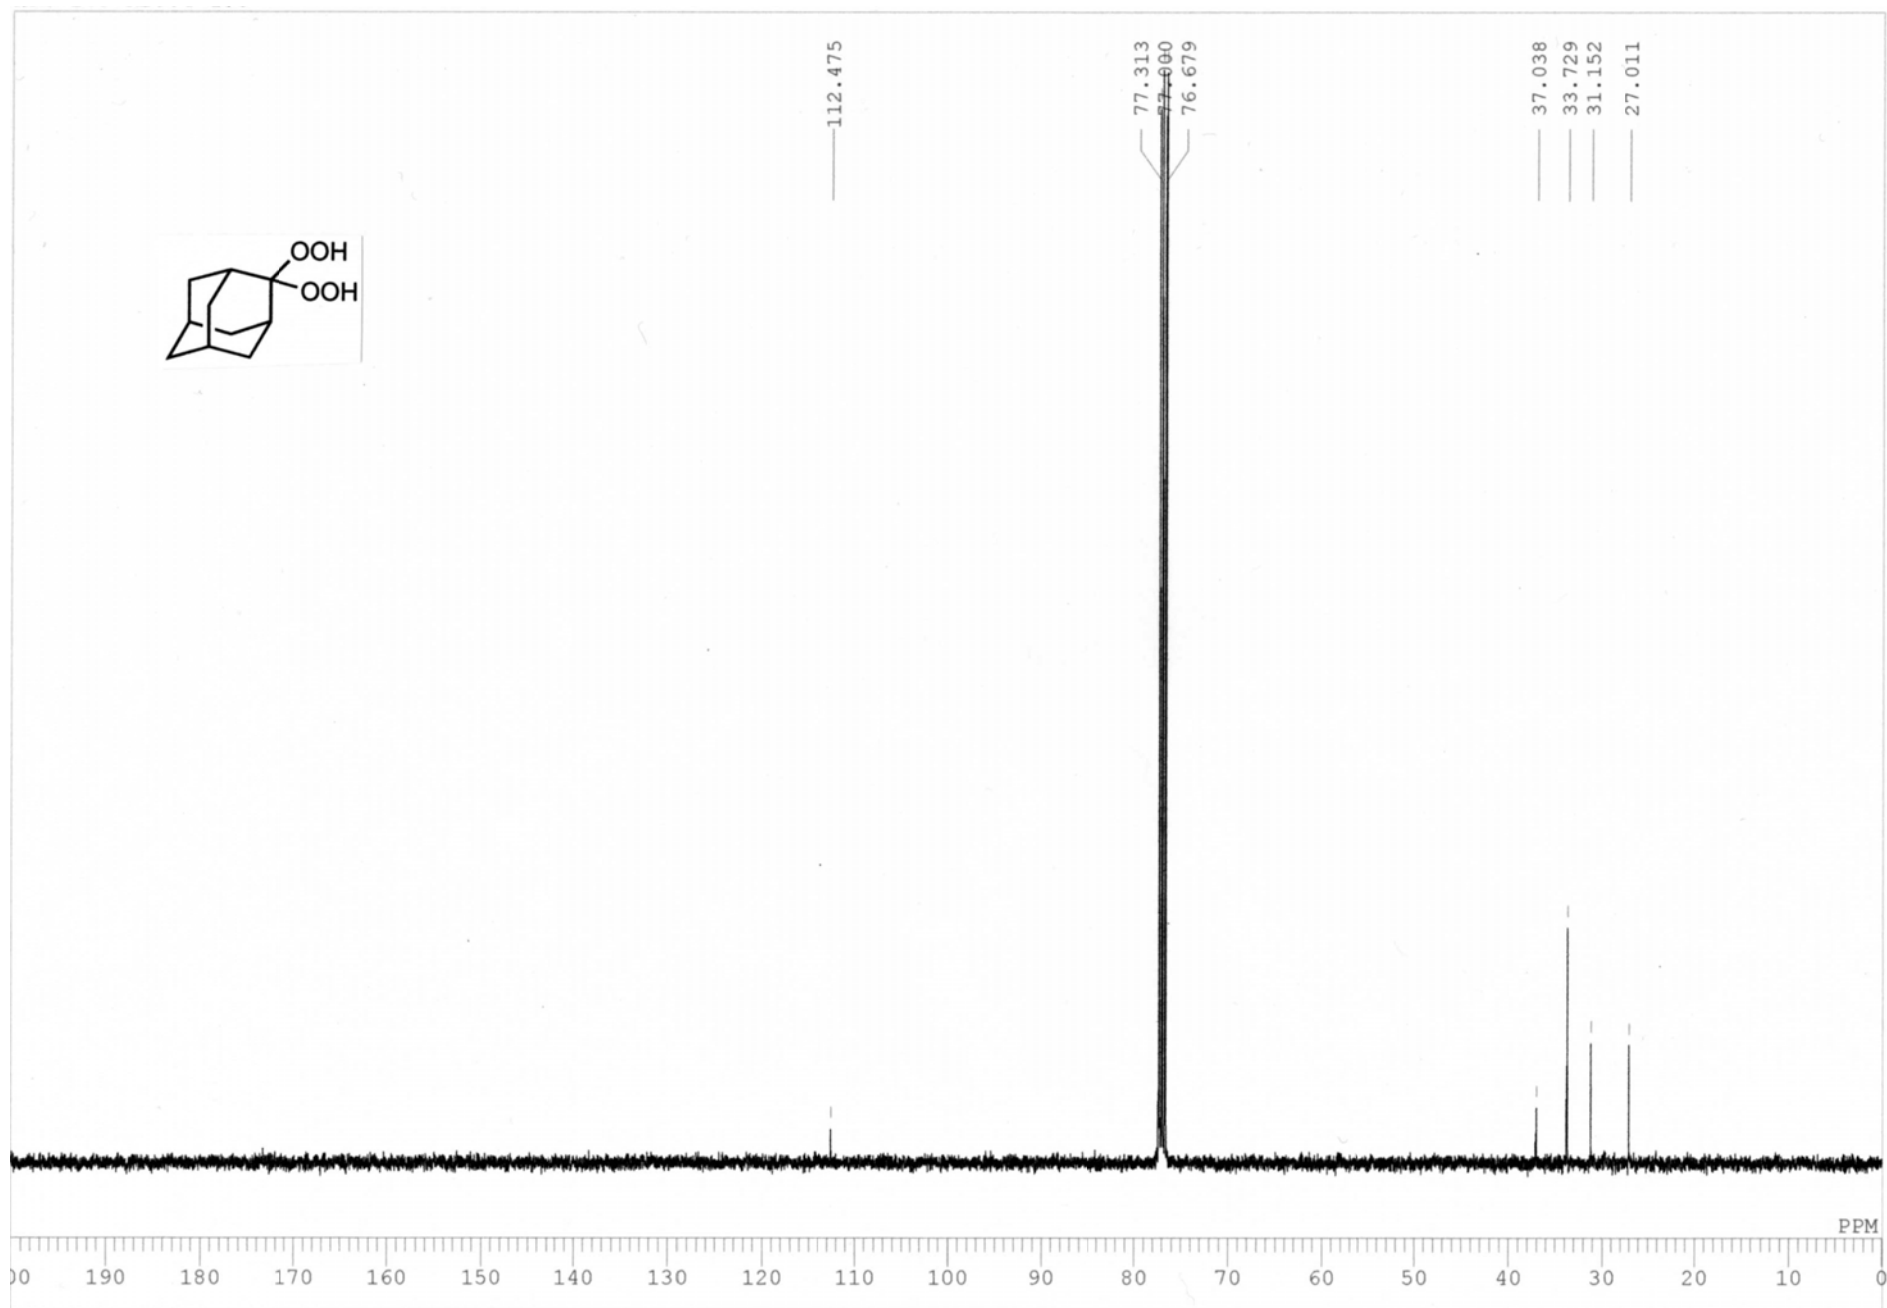

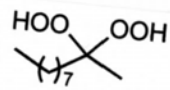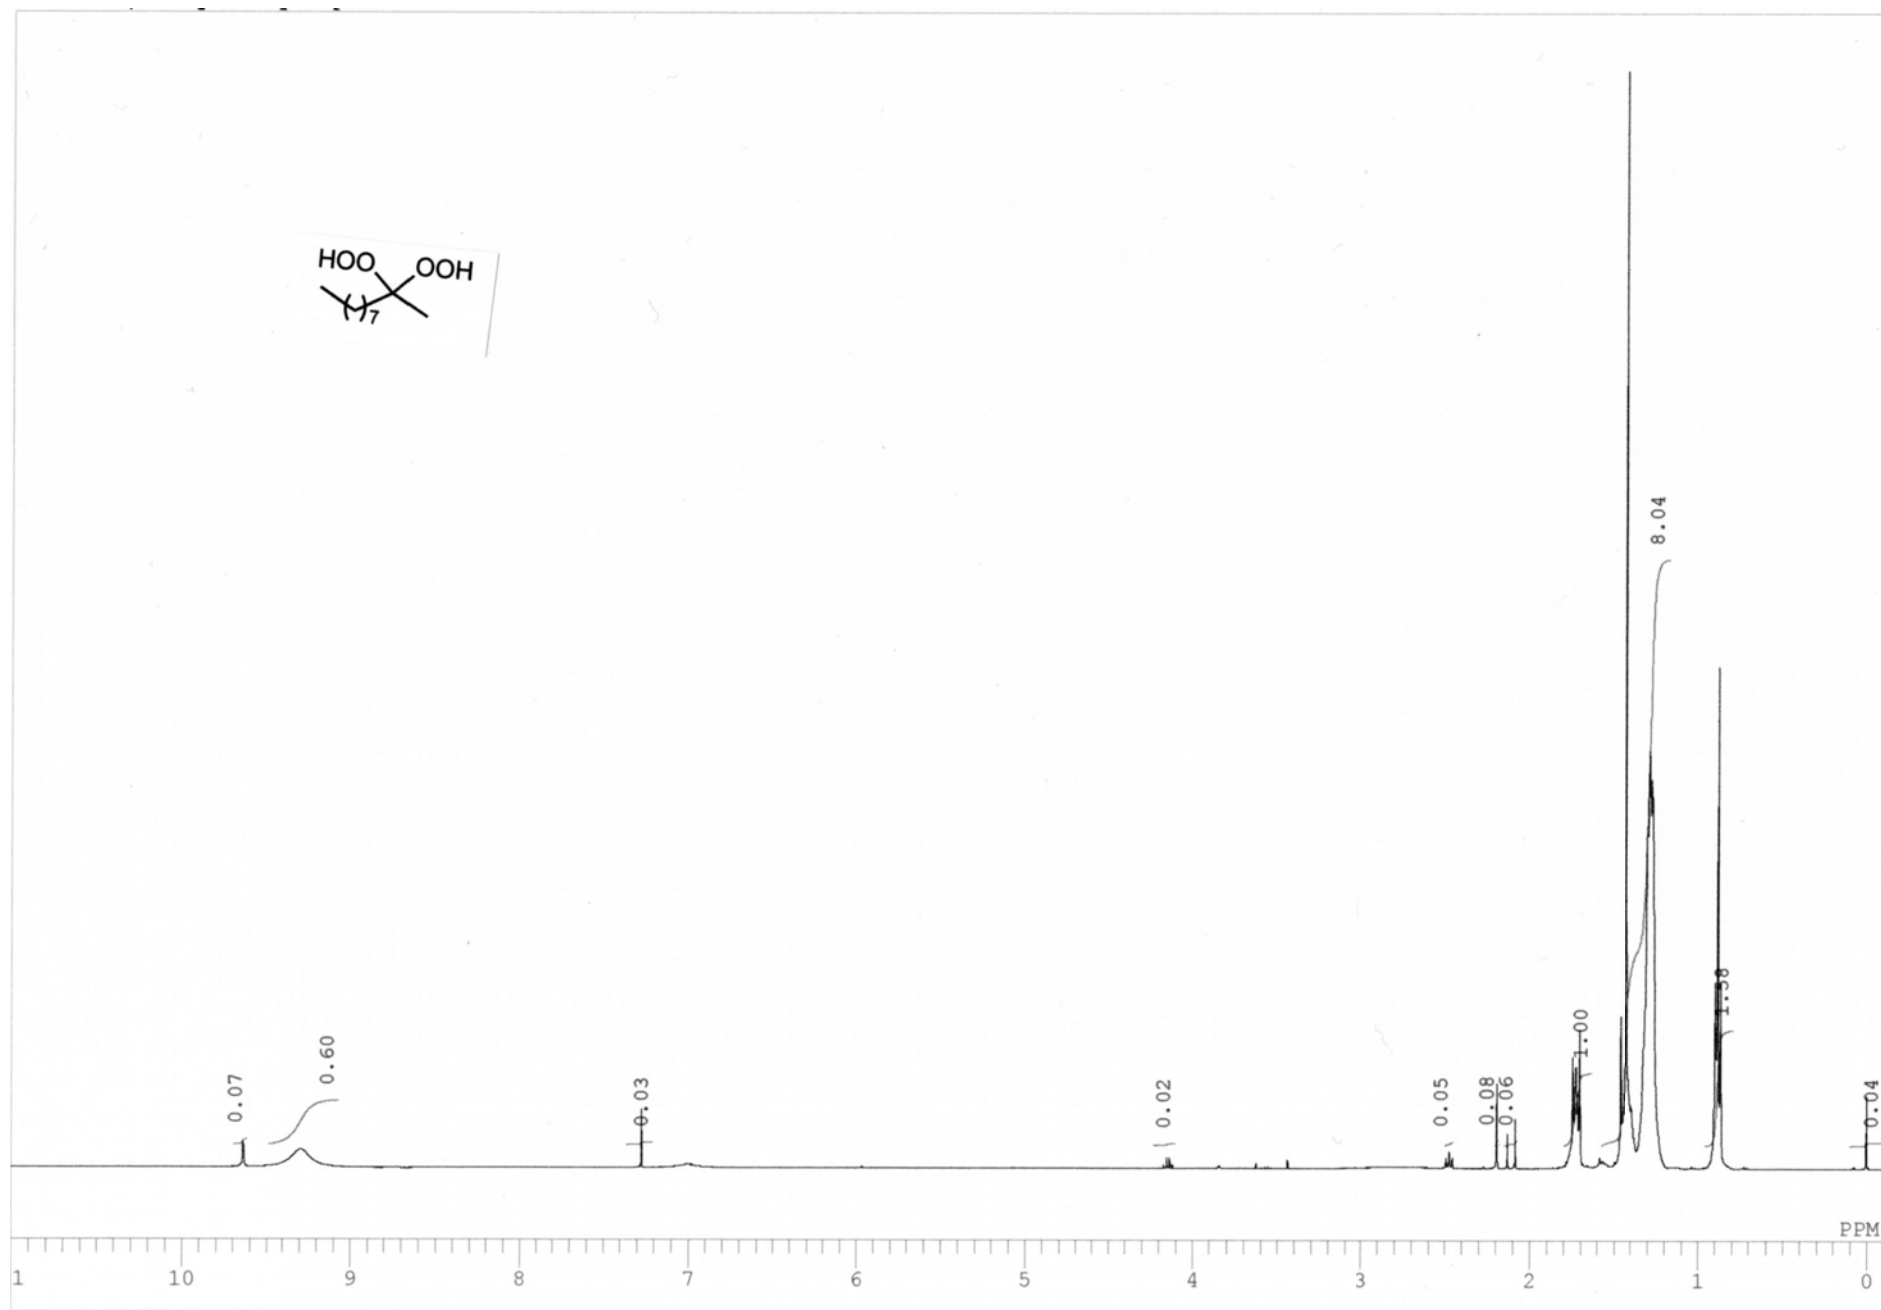

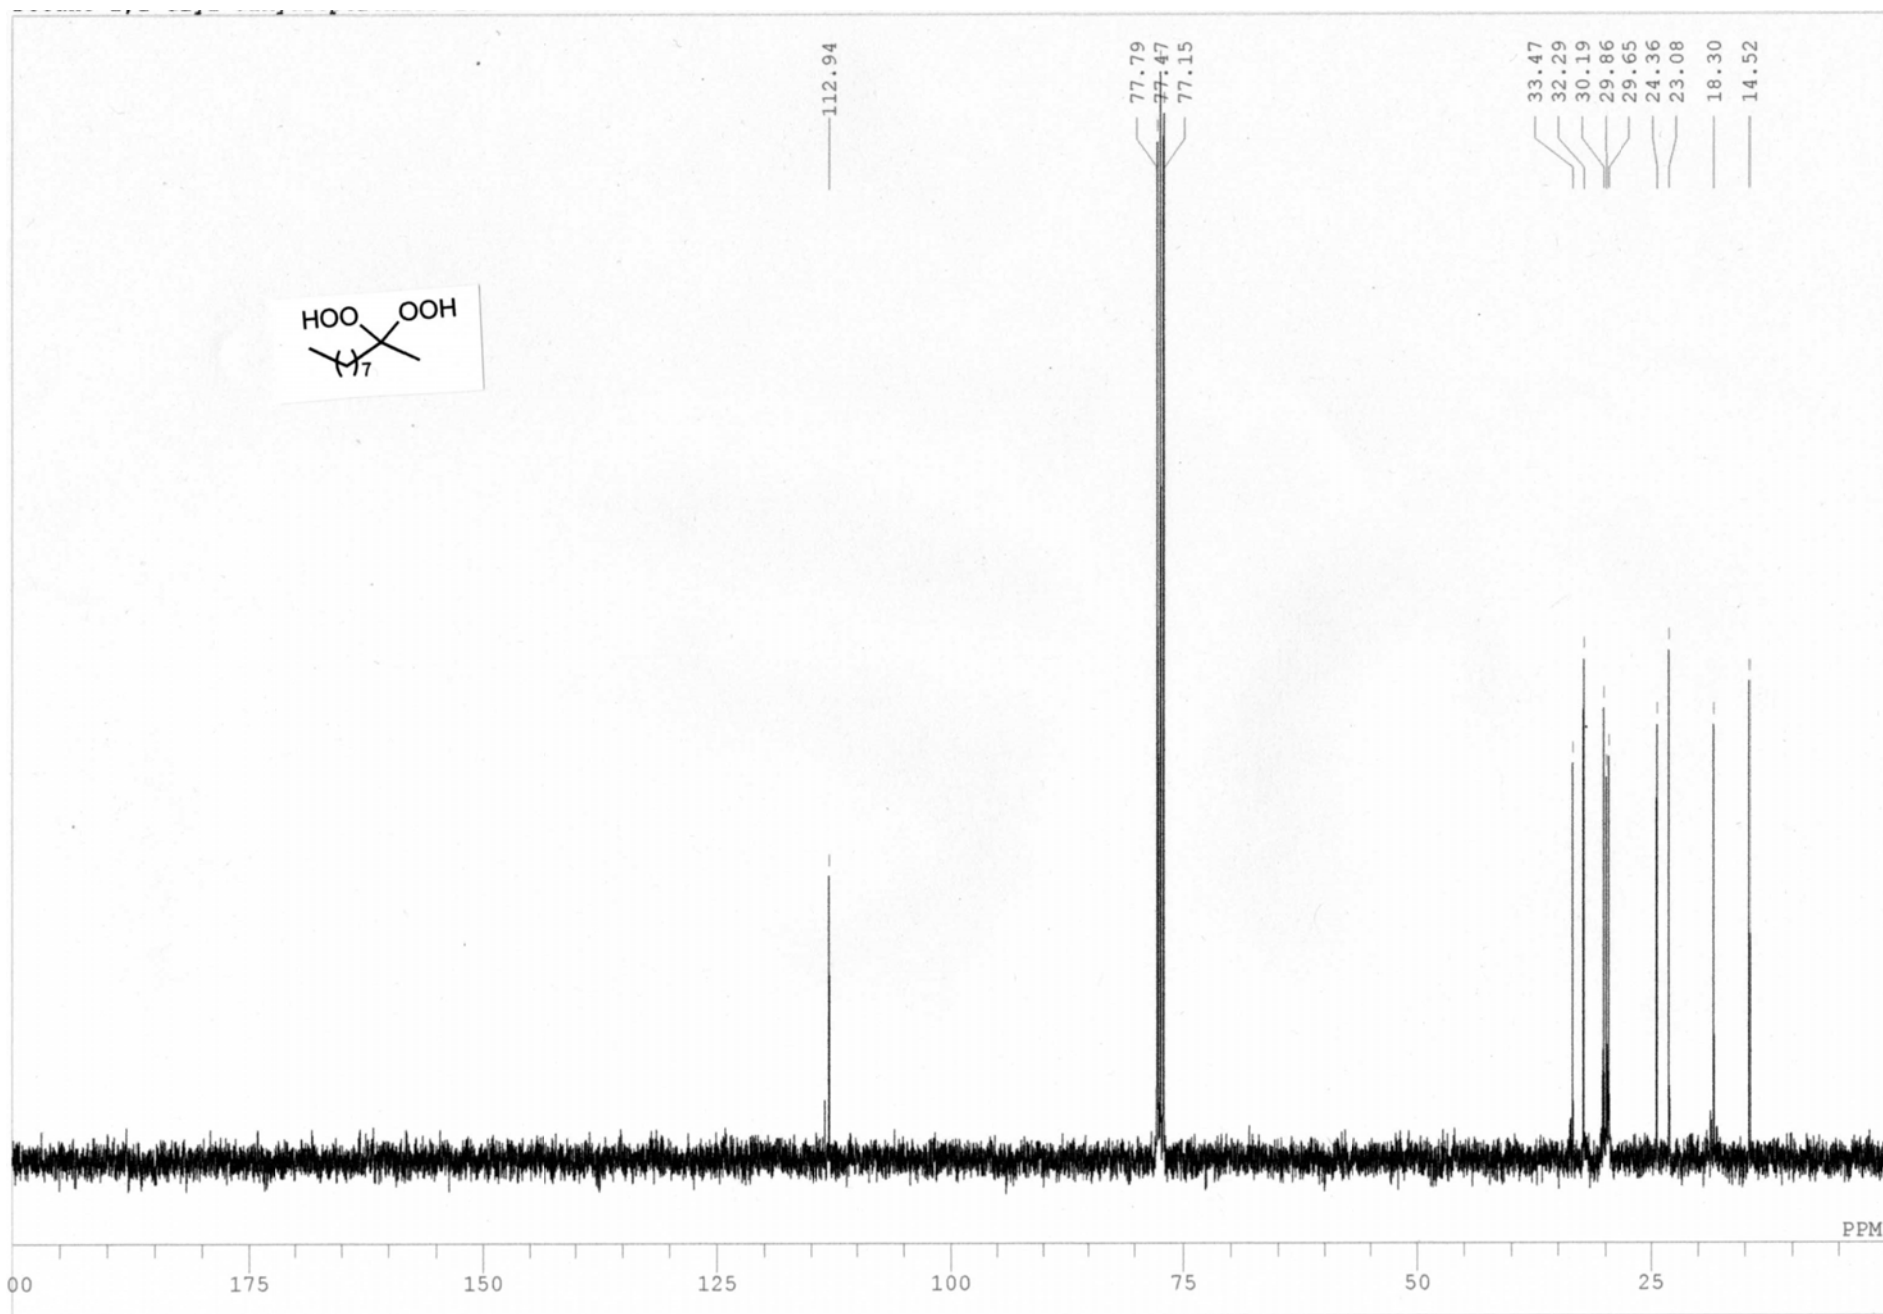



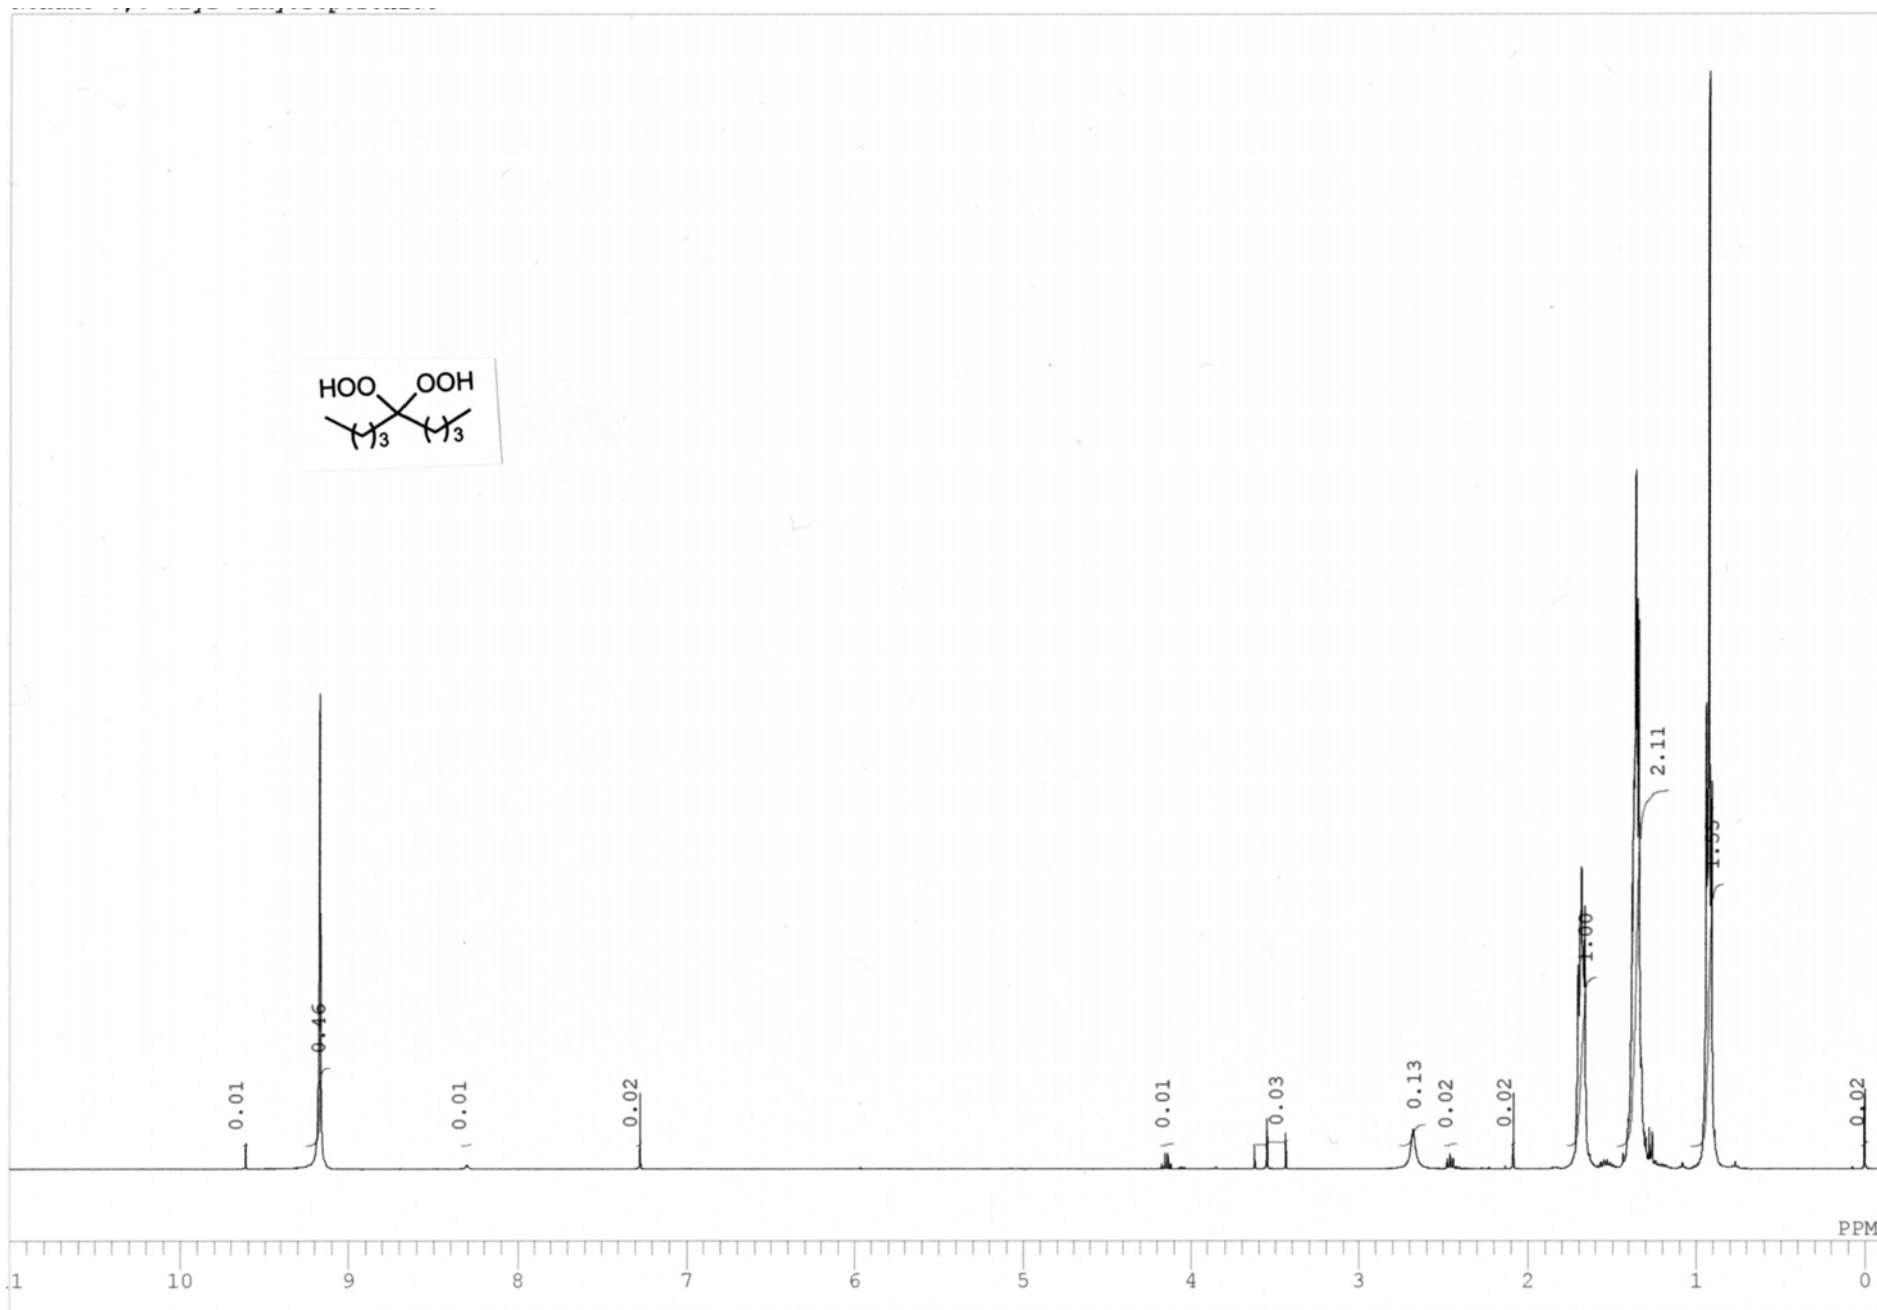

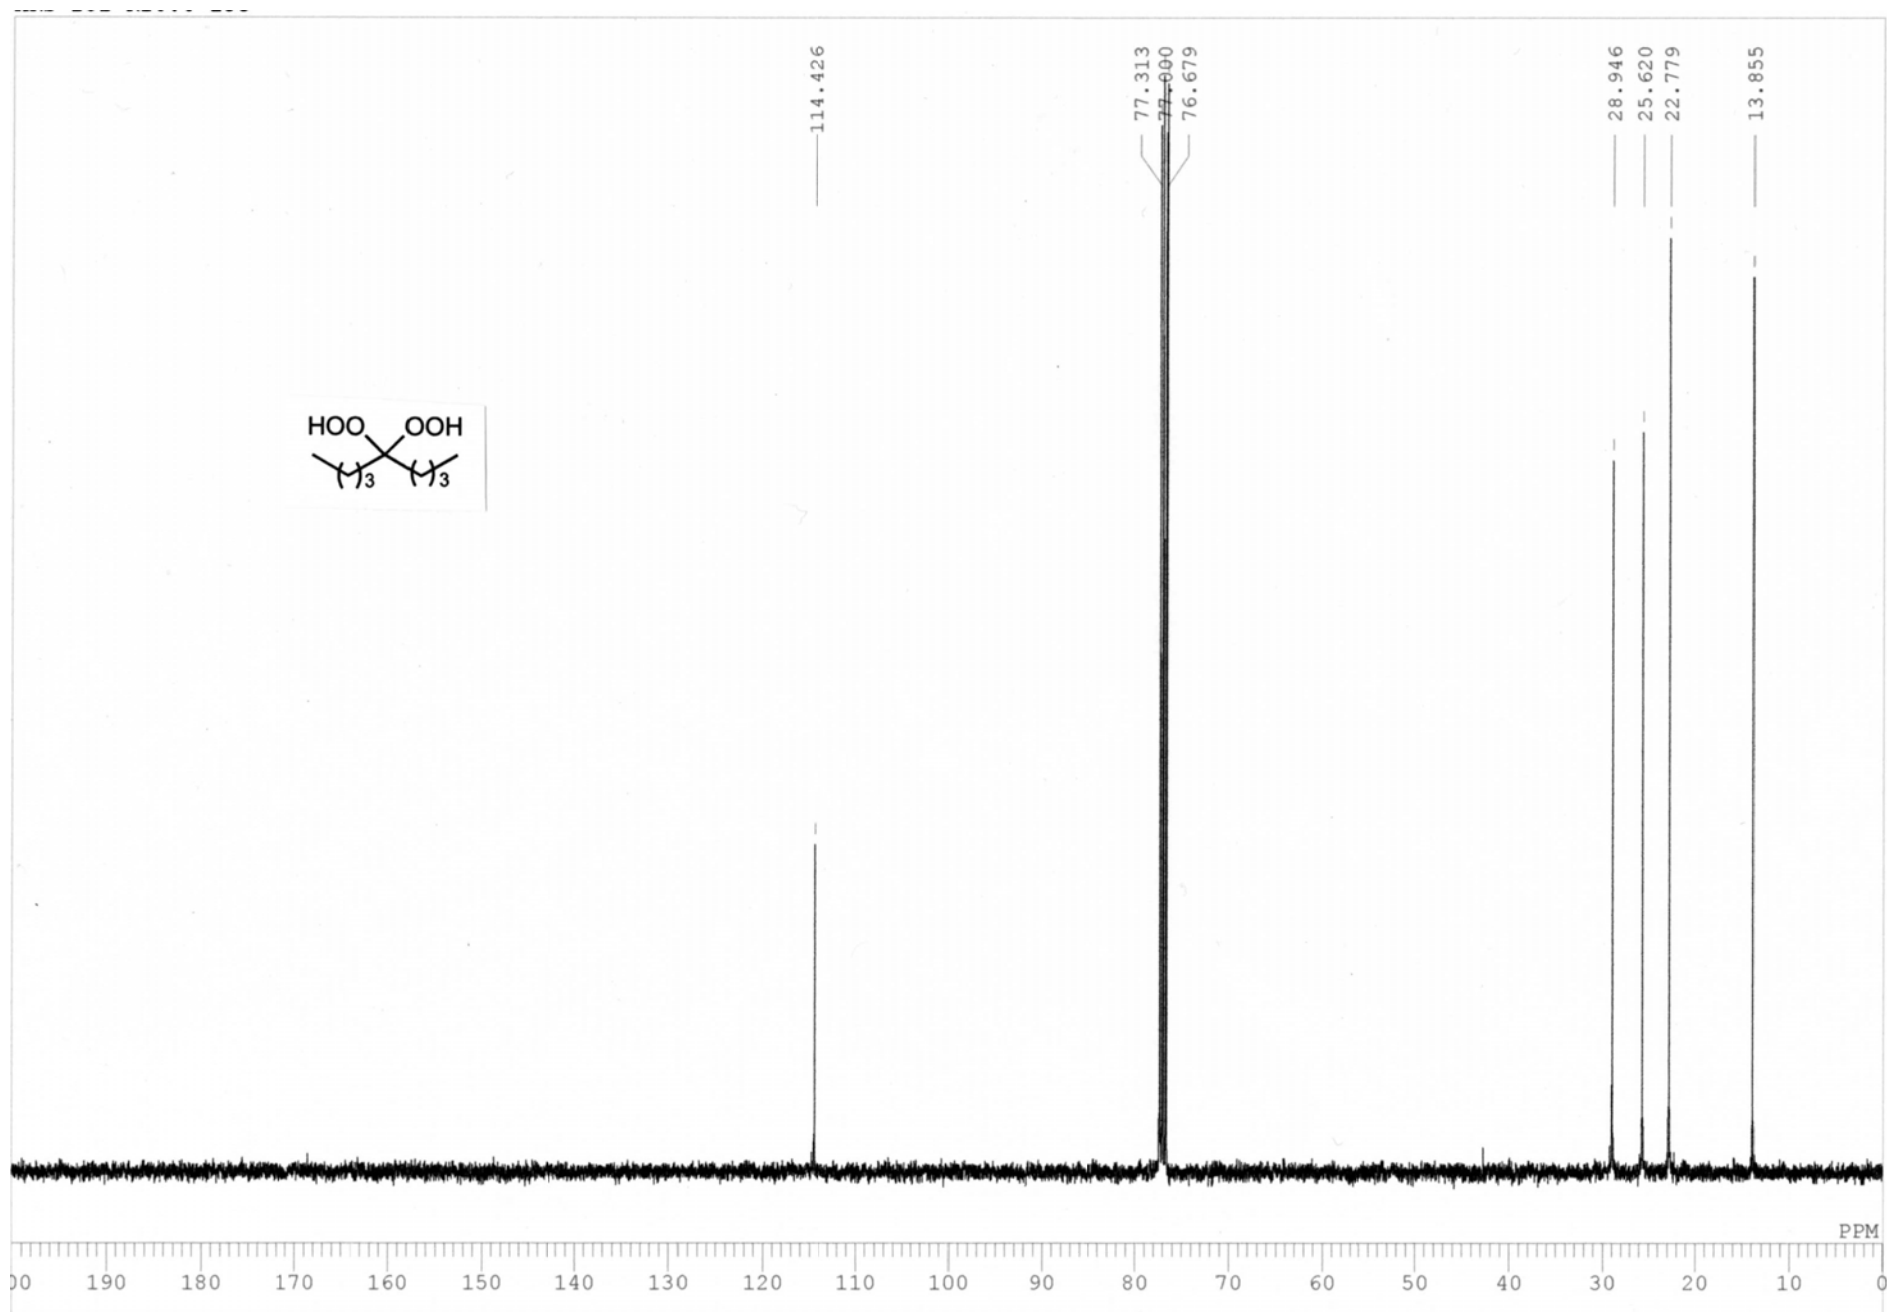

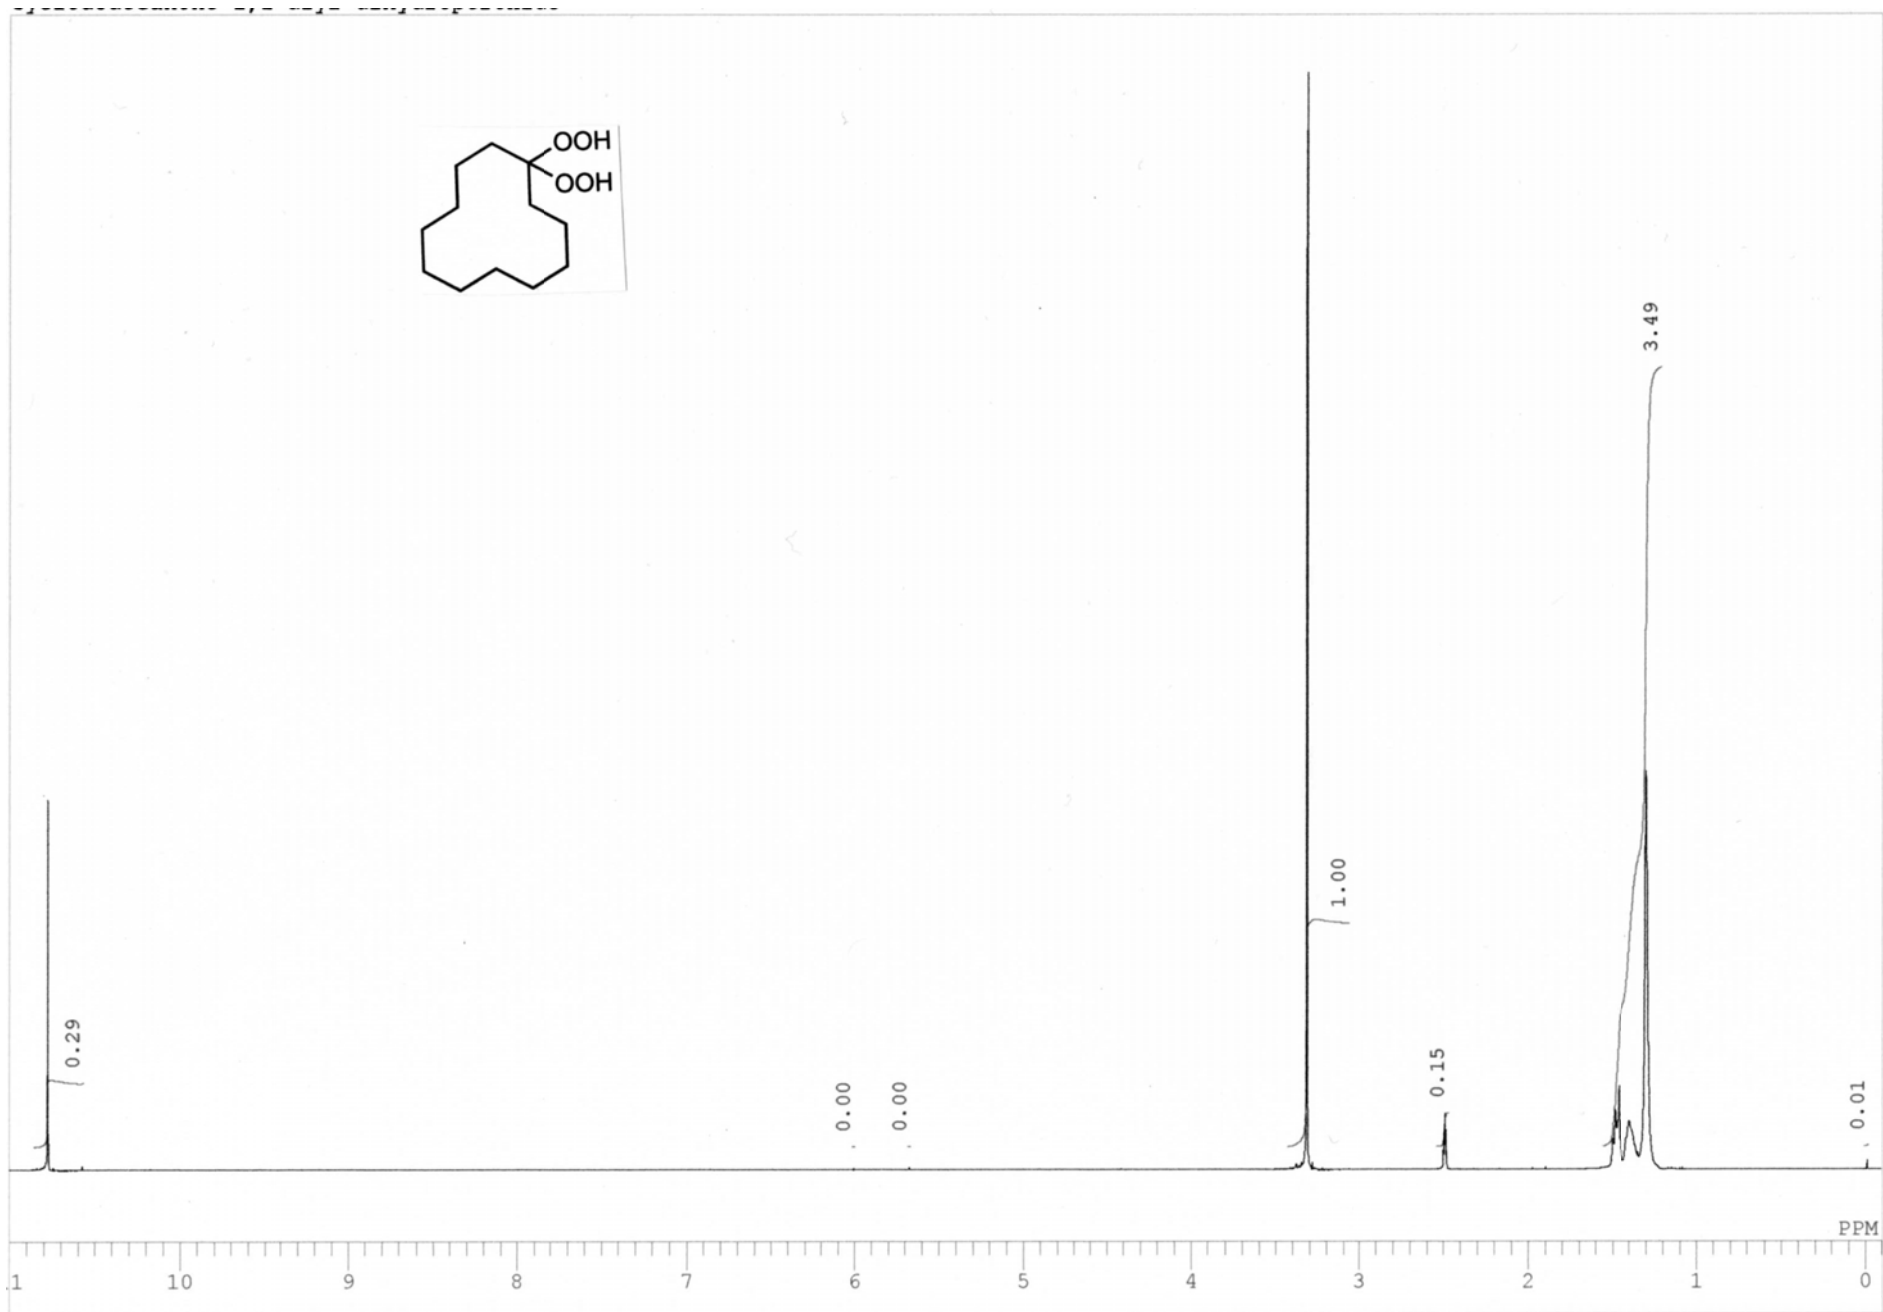

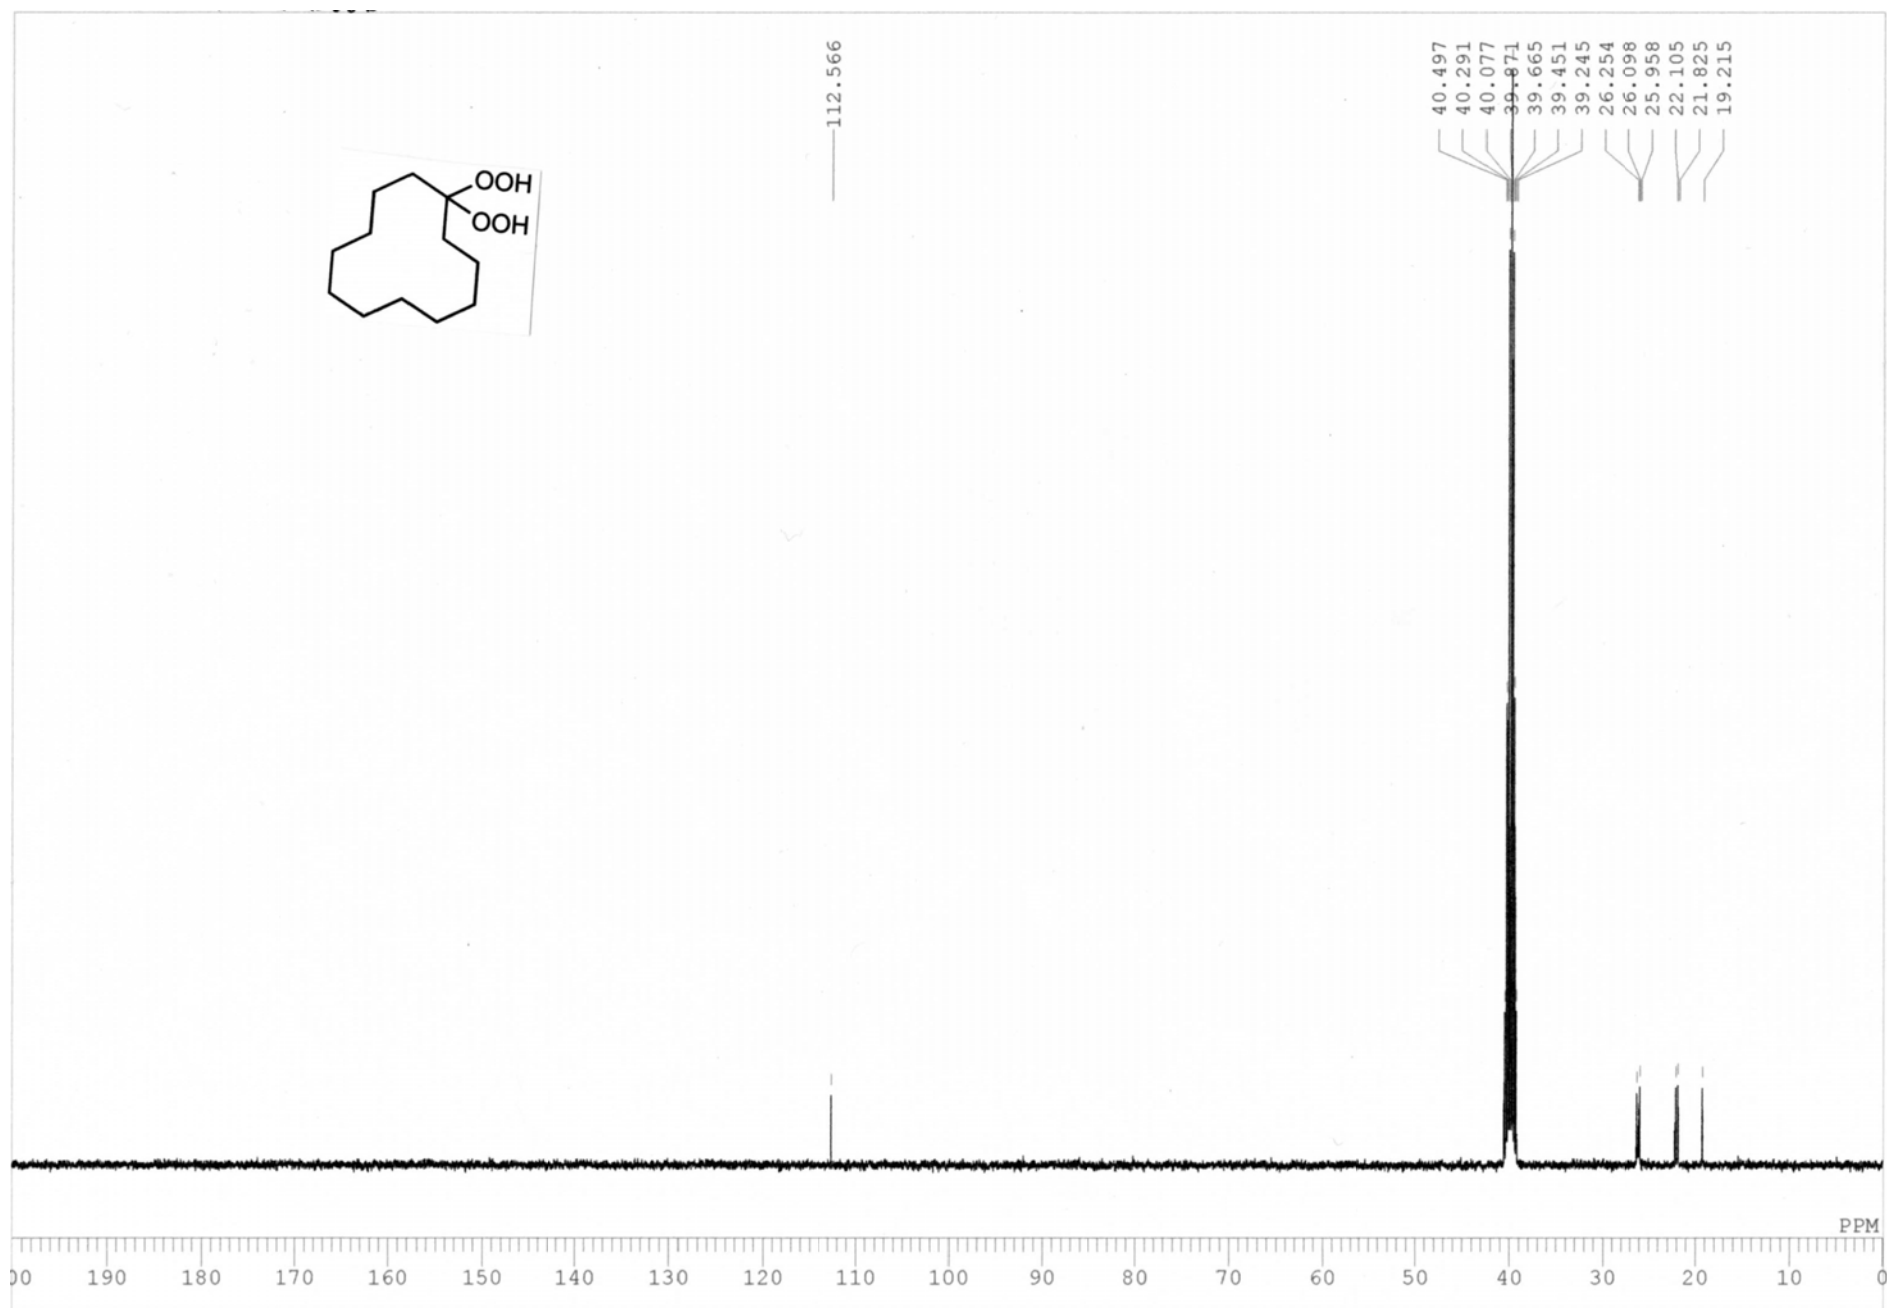

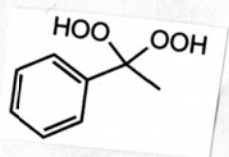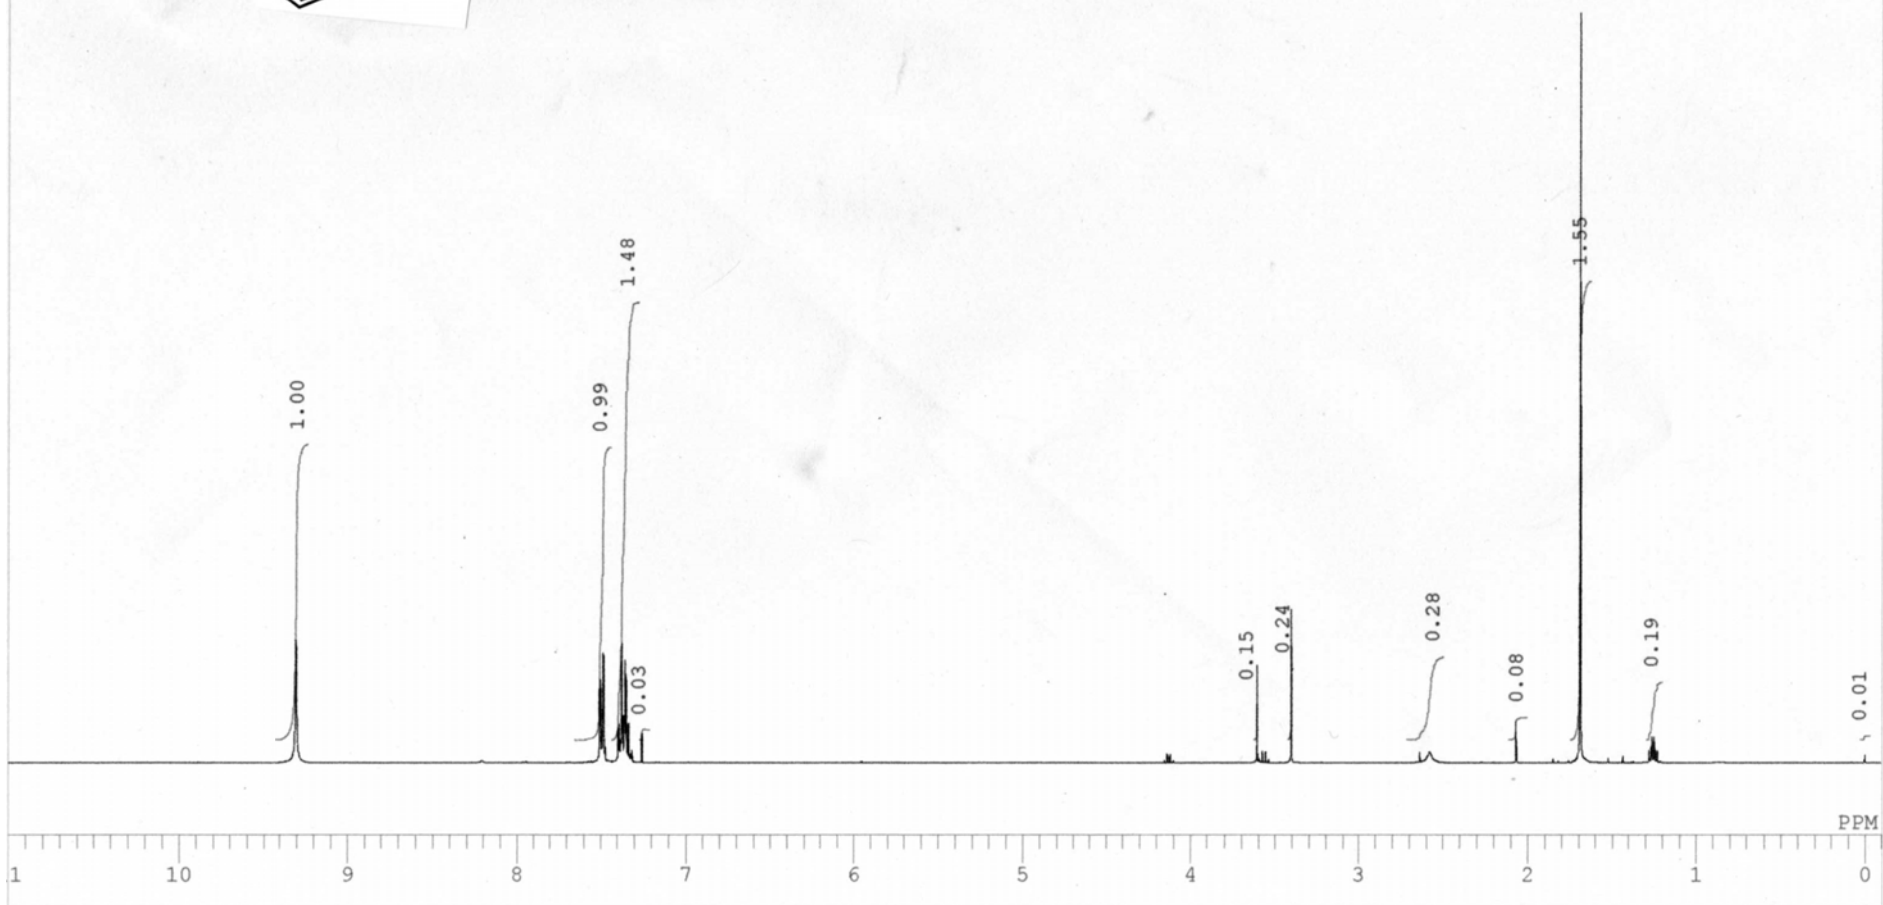

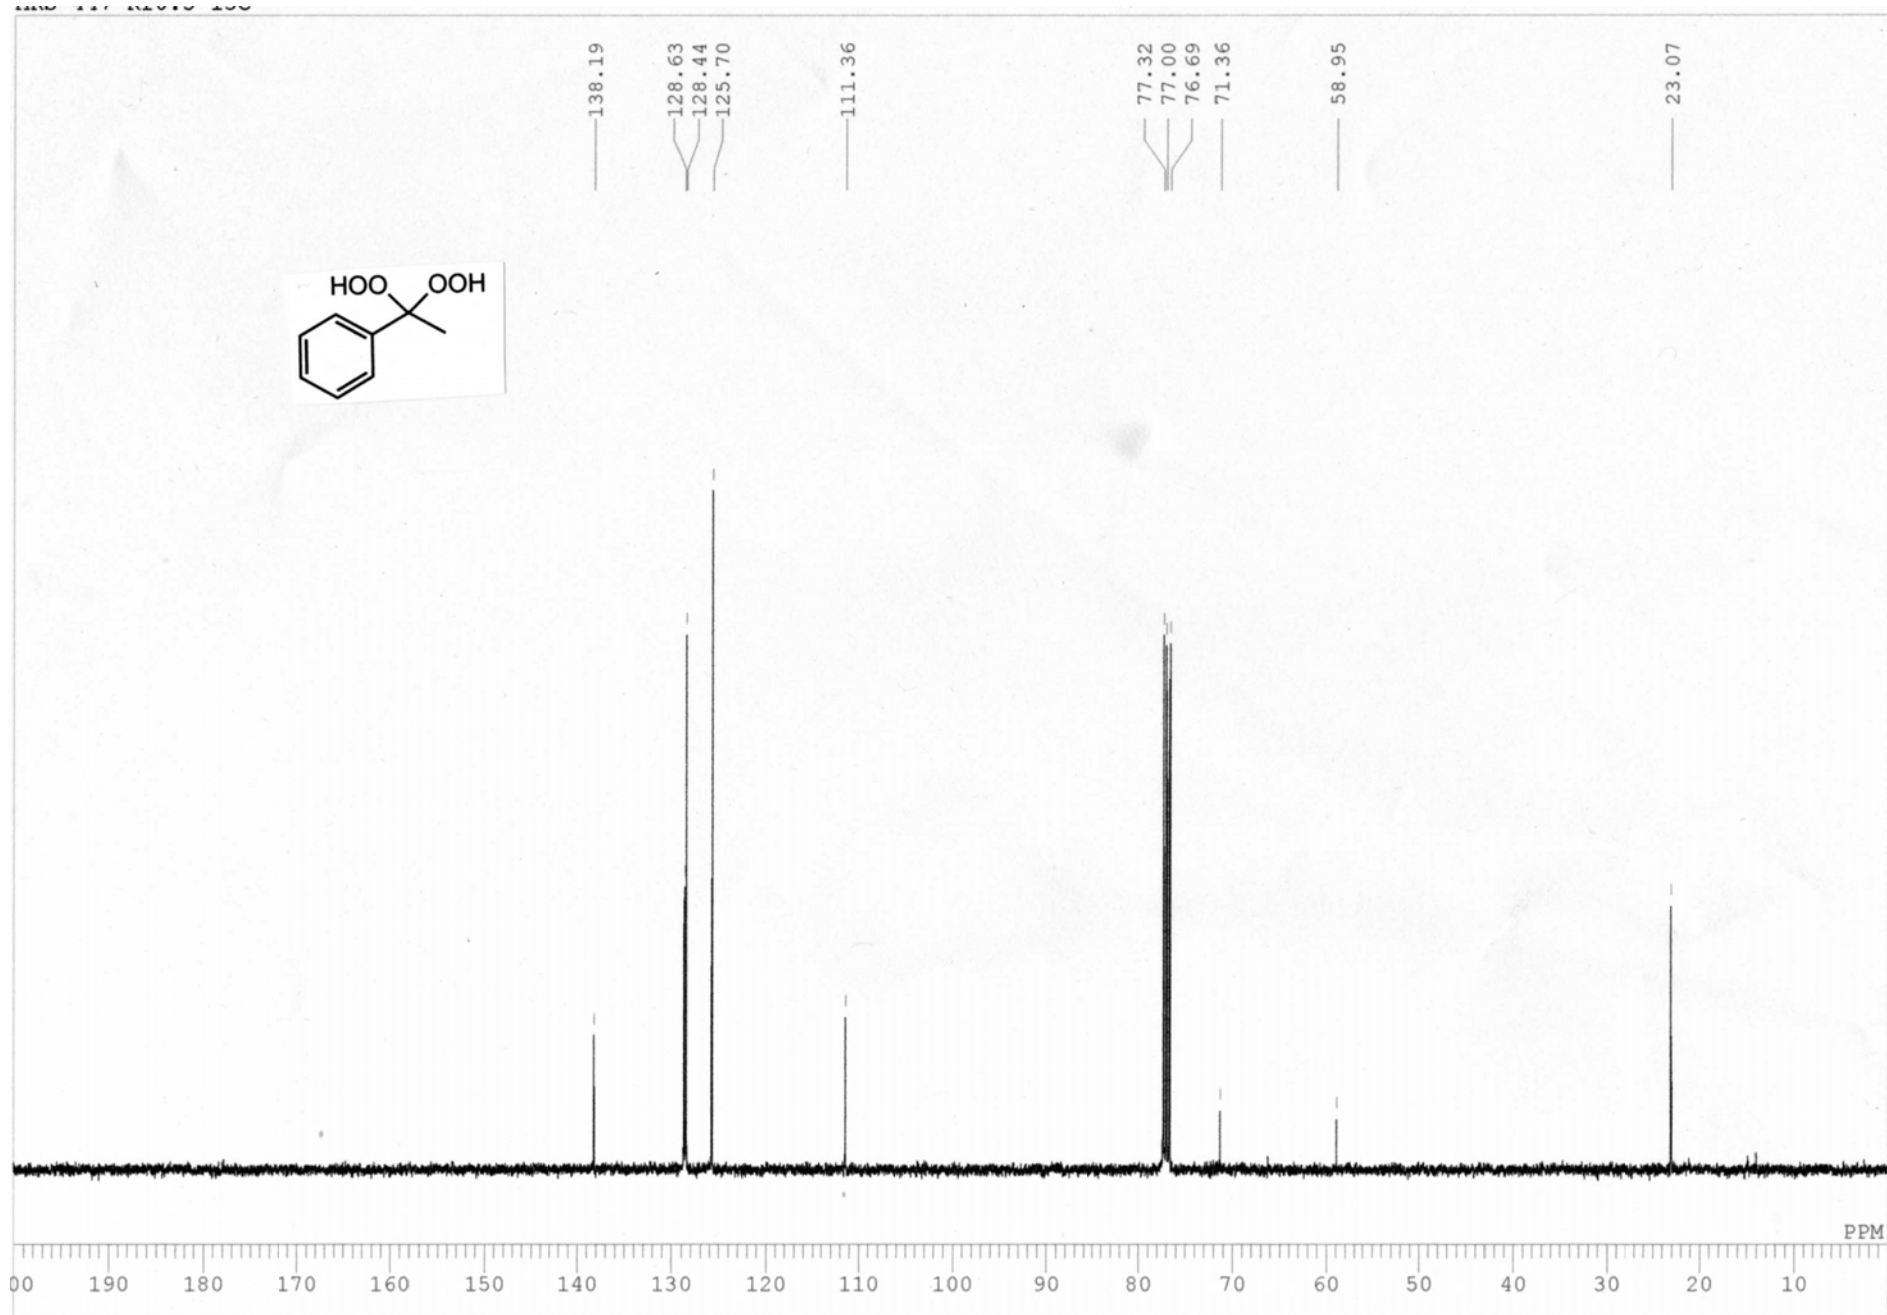

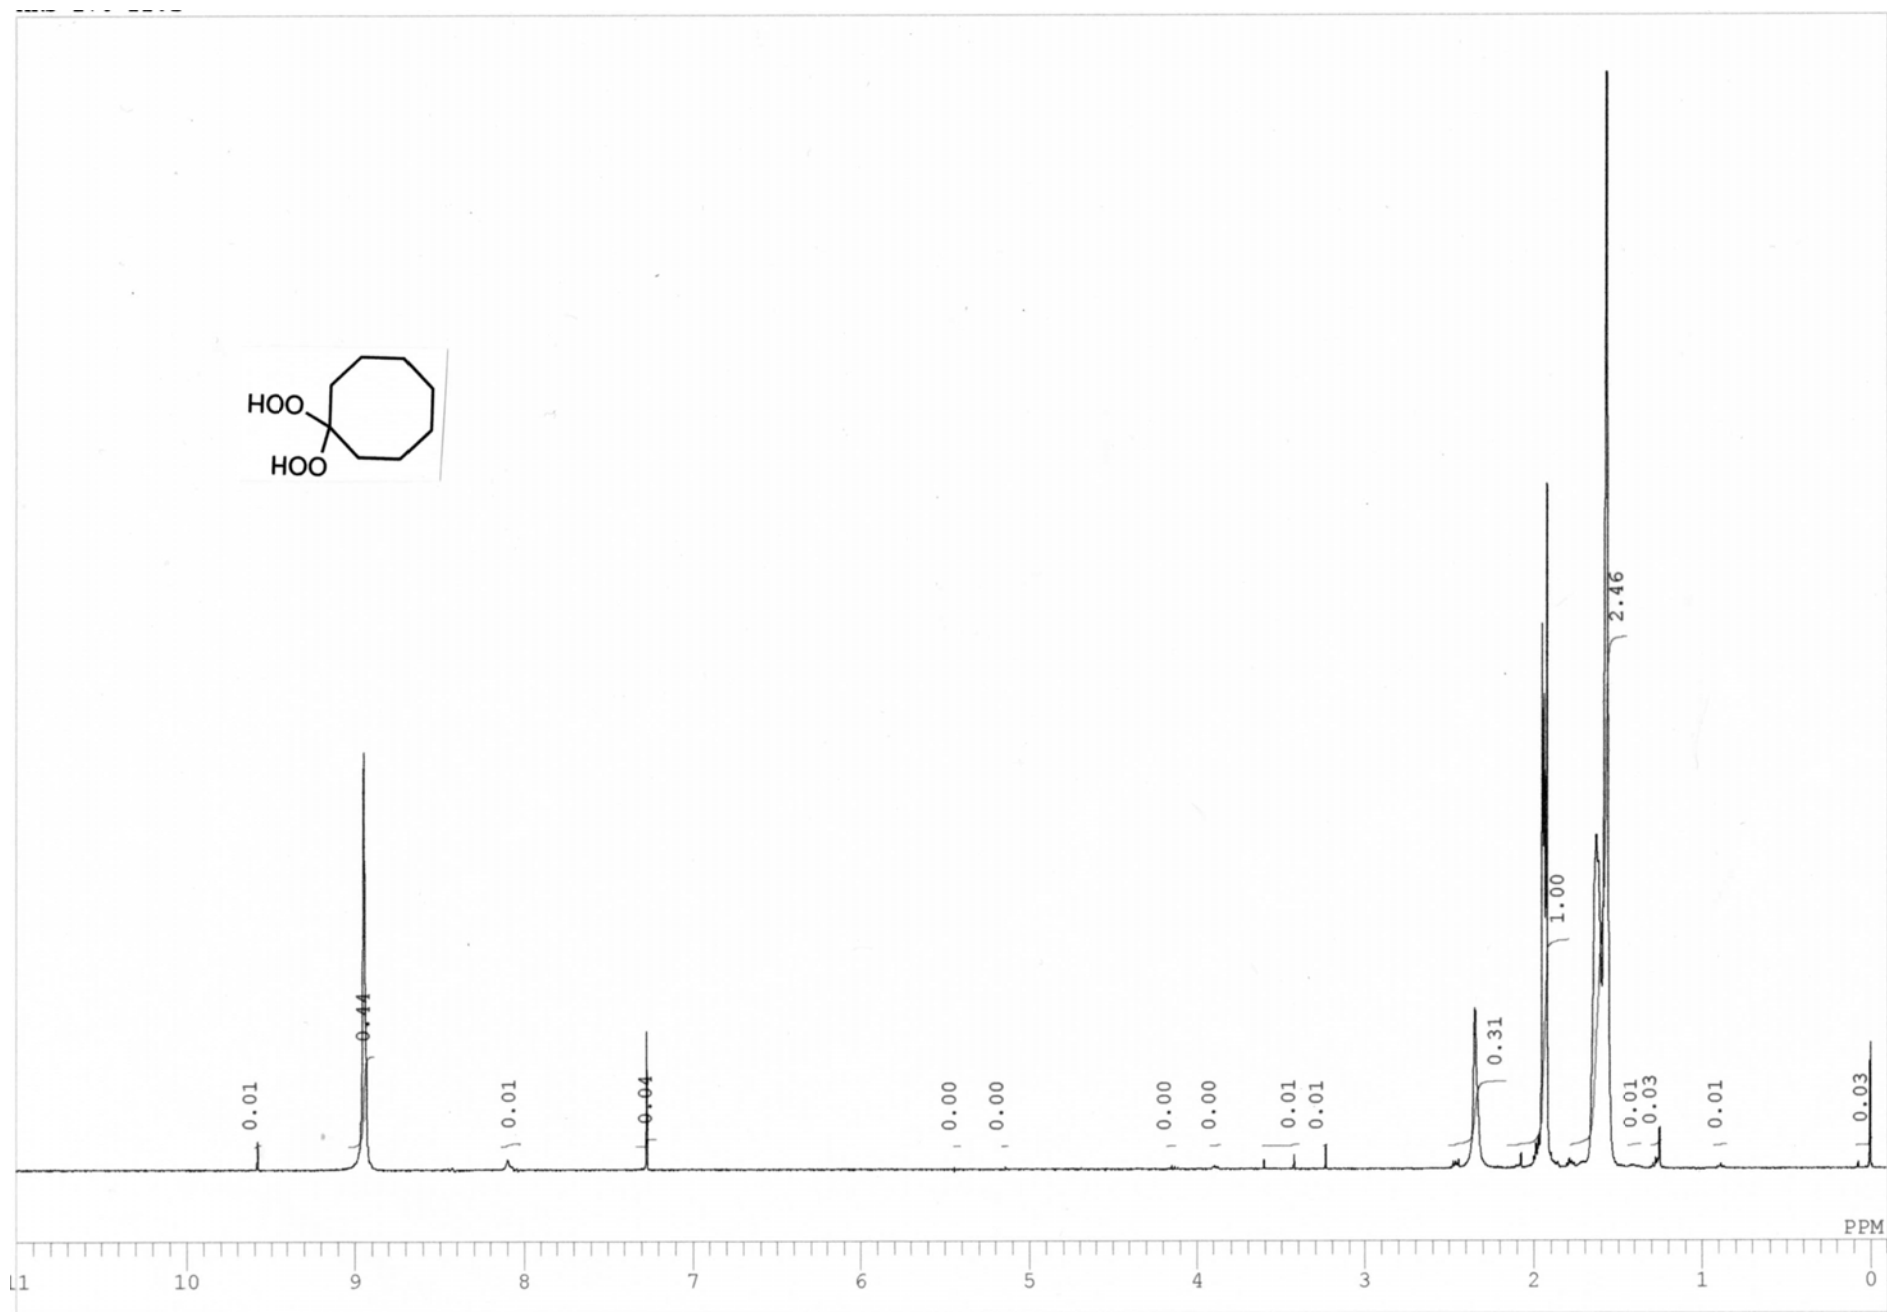

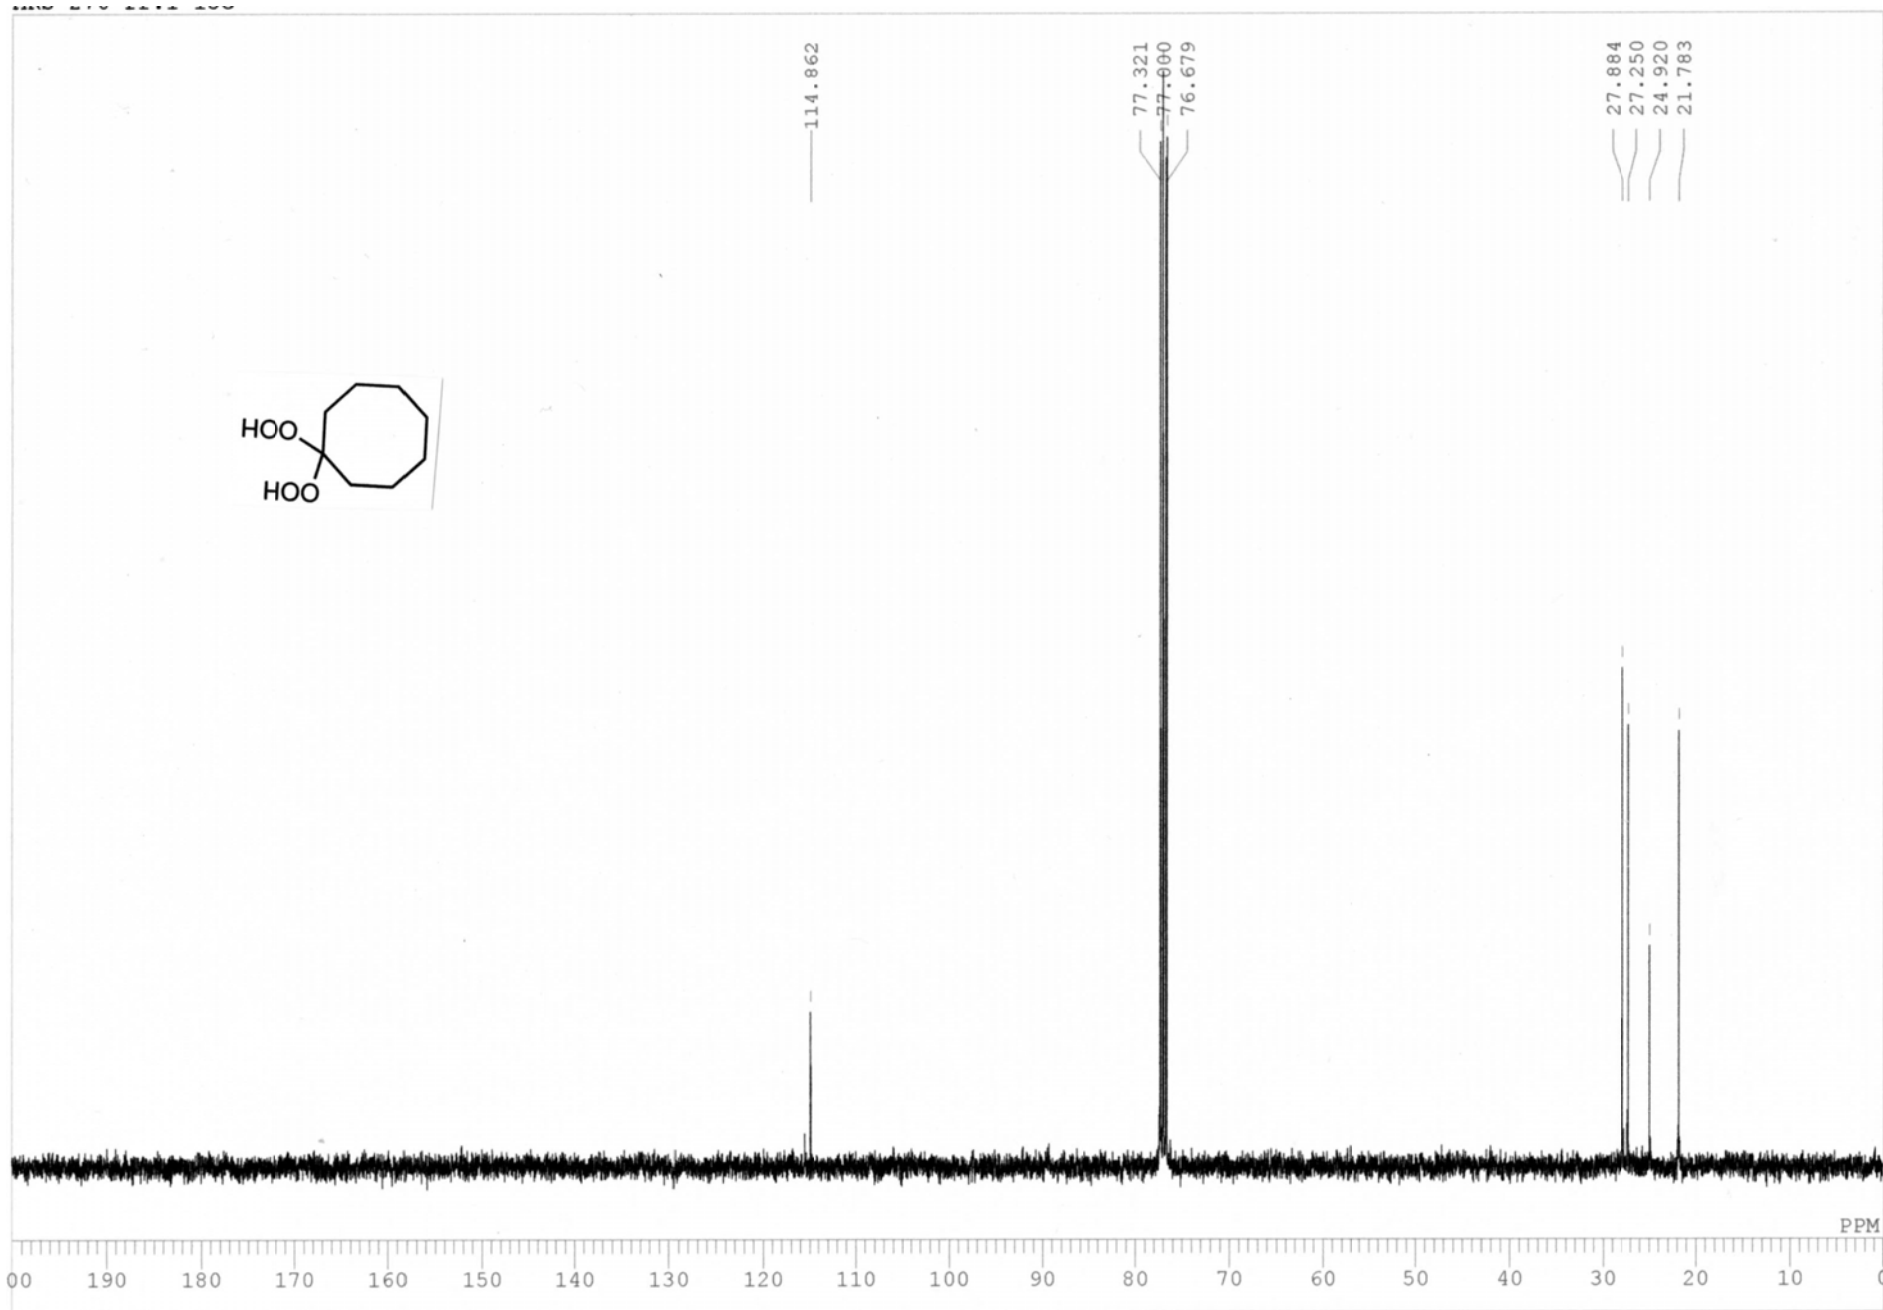



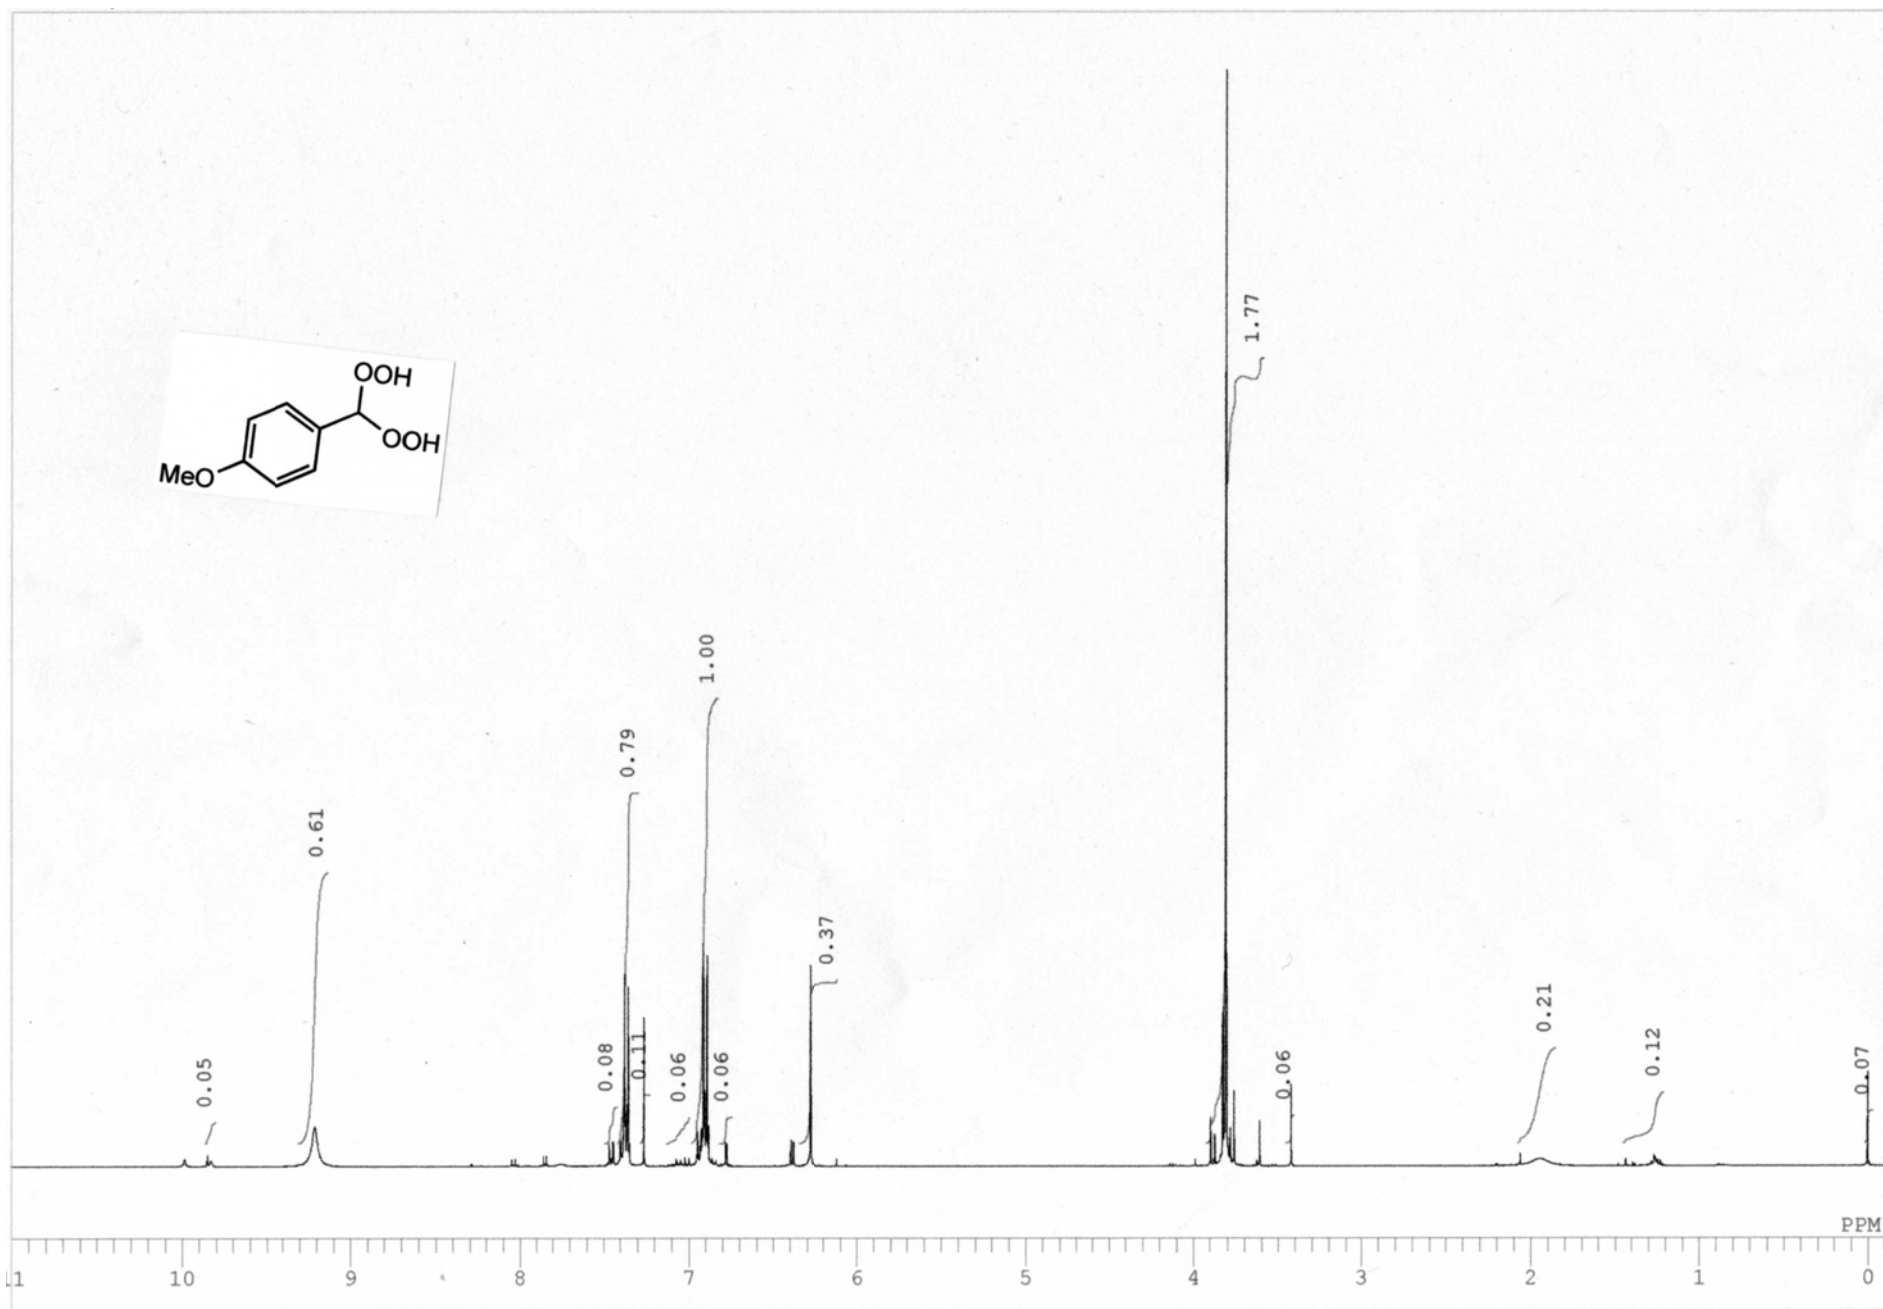

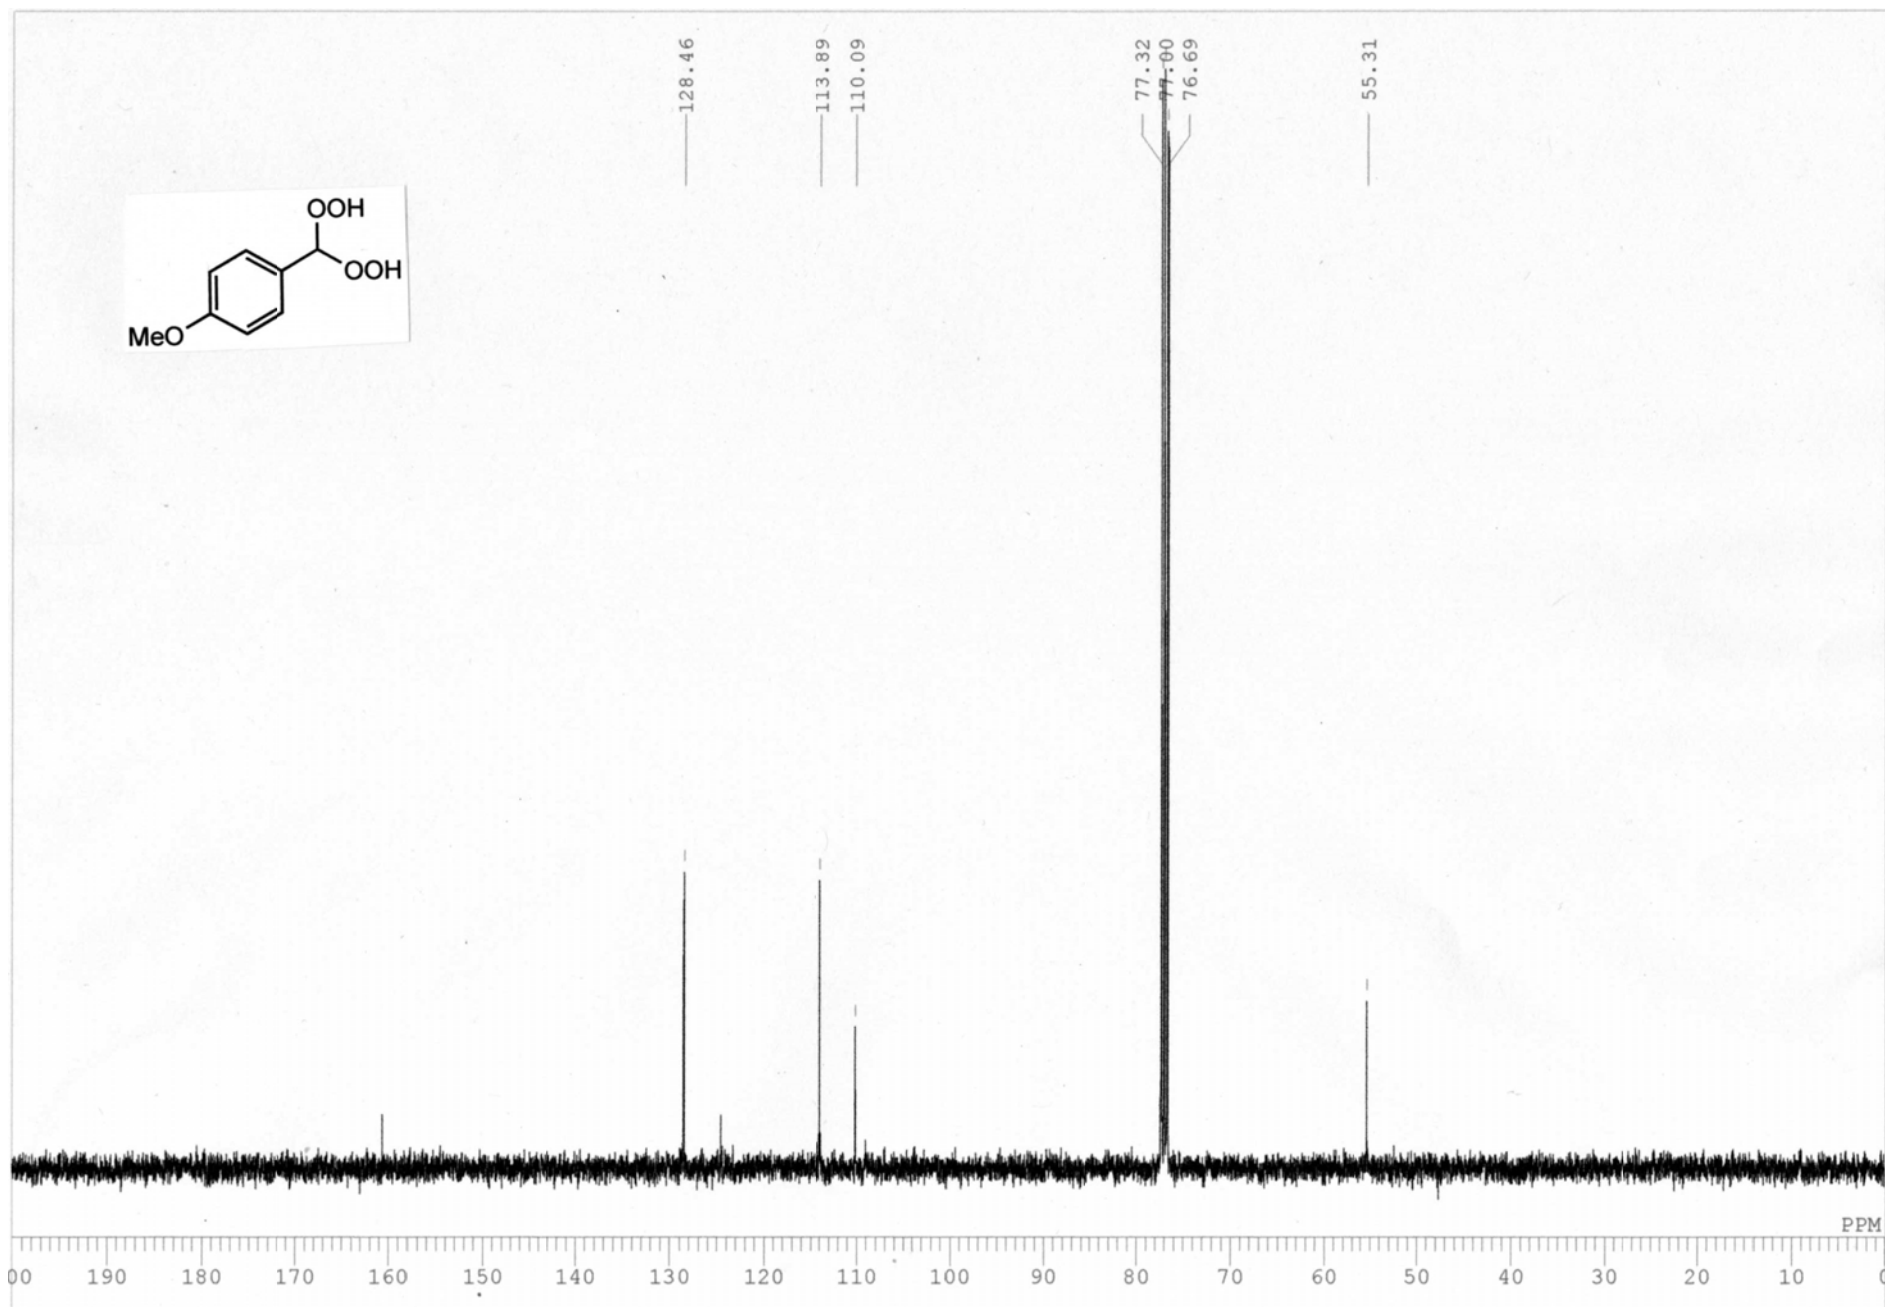

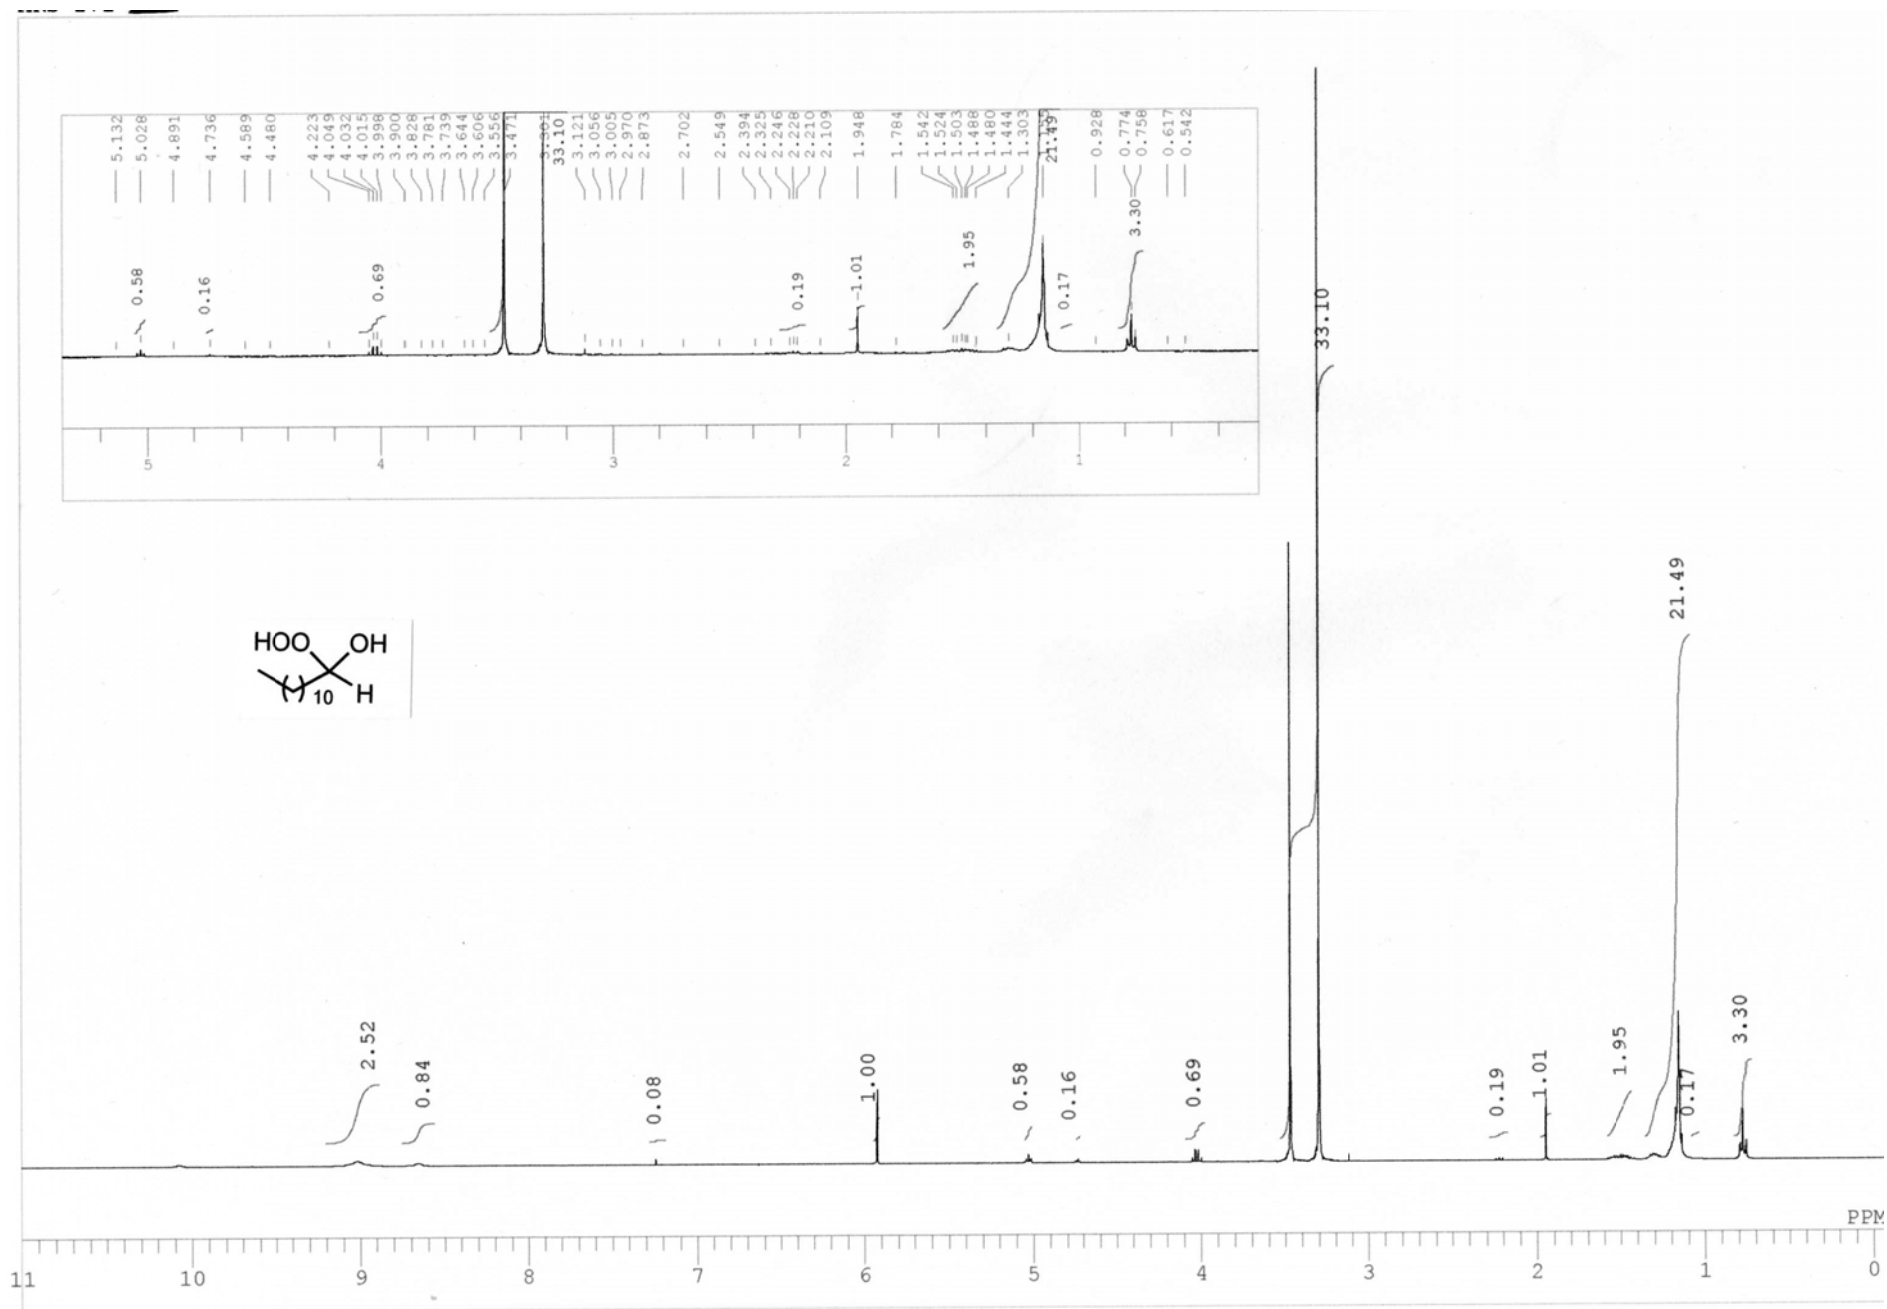

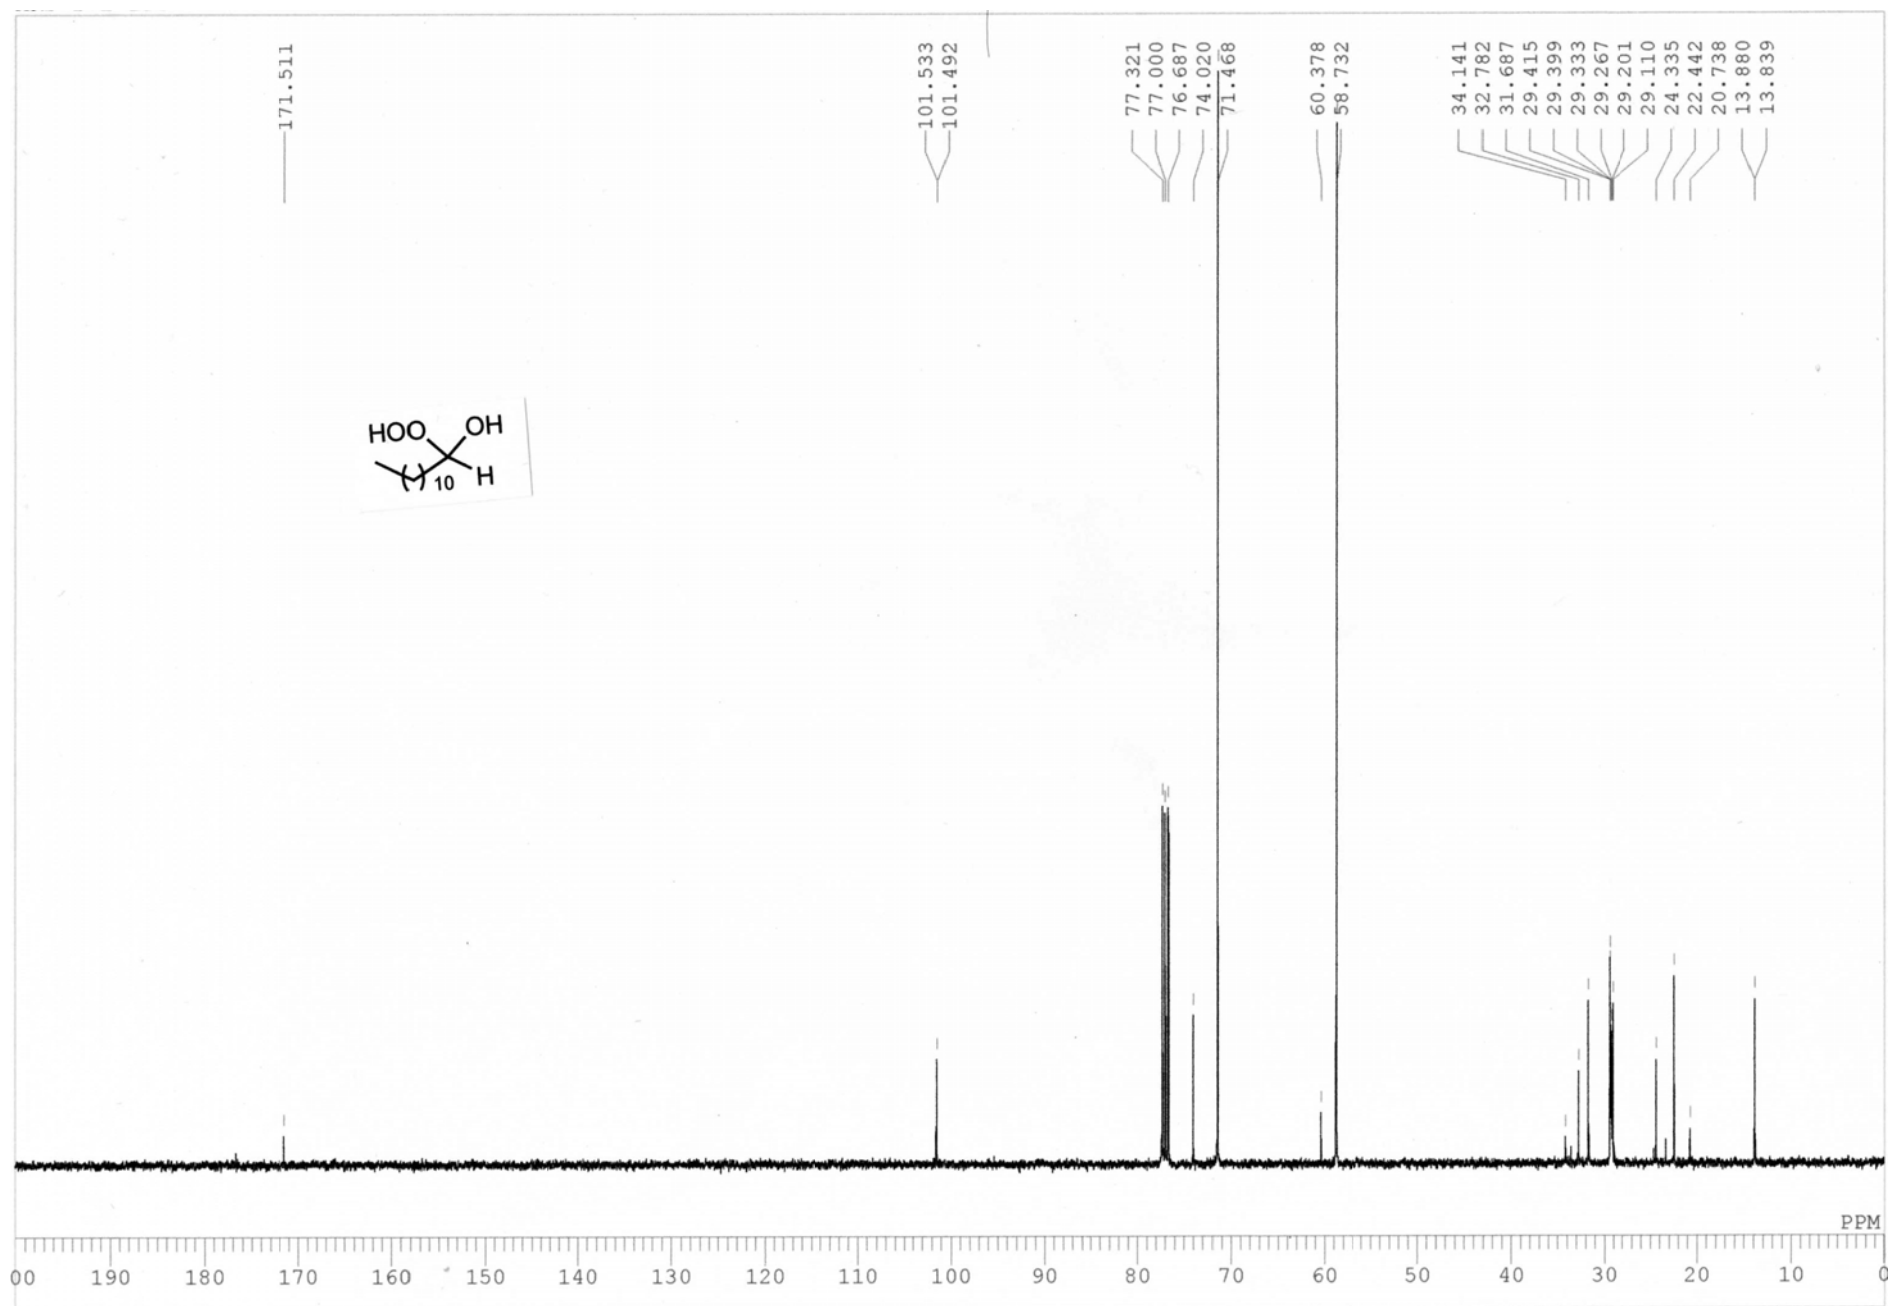

Supplement: b917056a.pdf [file b917056a.pdf]
